# Supplementary material for: Risk factors associated with length of hospital stay and medical expenses in pulmonary abscess patients: retrospective study
Source: PeerJ. 2023 Apr 12;11:e15106. doi: 10.7717/peerj.15106 (PMC10105557; doi:10.7717/peerj.15106)
Supplement: Supplemental Information 1 [file peerj-11-15106-s001.xlsx]

## Sheet: Pulmonary abscess patients
No.	Gender	Age	Treatment results	General ward duration	ICU duration	Total hospitalization duration	Hospitalization cost
1	Male	70	Better	9	0	9	13802.5
2	Male	66	Untreated	3	0	3	7257.88
3	Male	52	Death / Abandonment	9	0	9	9364.3
4	Female	77	Better	15	0	15	36475.9
5	Male	82	Better	17	0	17	33052.2
6	Male	81	Better	8	2	10	18986.5
7	Male	60	Better	10	0	10	20543.7
8	Male	74	Better	10	0	10	20667.3
9	Male	82	Untreated	3	0	3	4292.53
10	Female	81	Better	18	6	24	71289.4
11	Male	55	Better	36	0	36	49200.6
12	Male	51	Better	36	0	36	70393.3
13	Male	41	Better	11	0	11	10635.4
14	Male	63	Better	2	0	2	7771.52
15	Male	56	Better	5	0	5	17723.4
16	Male	81	Better	20	2	22	39892.2
17	Male	64	Better	23	10	33	58046.8
18	Female	53	Better	14	0	14	10425.4
19	Male	72	Better	27	0	27	65931.5
20	Male	34	Better	12	3	15	44505.1
21	Male	55	Better	11	0	11	8893.47
22	Male	47	Better	34	0	34	47765.1
23	Male	66	Better	26	0	26	31041
24	Male	82	Better	27	0	27	52286.6
25	Male	65	Better	9	0	9	8092.89
26	Female	82	Better	7	0	7	13369.7
27	Male	74	Better	26	0	26	34695.1
28	Male	70	Better	12	0	12	20311.7
29	Male	51	Better	14	0	14	18832.1
30	Male	49	Better	26	0	26	44802.7
31	Male	26	Death / Abandonment	15	0	15	33219.9
32	Male	34	Better	27	0	27	44493.1
33	Male	39	Better	0	46	46	334573
34	Male	48	Better	10	0	10	14337.2
35	Female	63	Better	20	0	20	57606.1
36	Male	44	Better	37	0	37	69643.4
37	Male	81	Better	24	12	36	91629.7
38	Female	67	Better	6	0	6	18065.4
39	Male	61	Better	12	0	12	13006.6
40	Female	56	Better	30	0	30	51407.1
41	Male	21	Better	8	3	11	24721
42	Female	79	Better	41	0	41	80306.5
43	Male	61	Better	12	0	12	11048
44	Male	32	Better	4	0	4	8563.17
45	Female	63	Better	9	0	9	13434.8
46	Male	58	Better	30	0	30	28730.2
47	Female	63	Better	6	0	6	6533.26
48	Female	17	Better	4	0	4	7660.02
49	Male	66	Better	38	0	38	49040.5
50	Male	60	Better	4	0	4	15269.9
51	Male	62	Better	13	0	13	14604.2
52	Male	64	Better	26	0	26	31093.9
53	Female	84	Better	13	0	13	22998.9
54	Male	80	Better	9	0	9	10545.3
55	Female	23	Better	35	0	35	29792.8
56	Female	58	Better	13	0	13	24049.3
57	Female	66	Better	25	8	33	60503.1
58	Male	57	Better	10	0	10	11519.2
59	Female	85	Better	18	0	18	22716.3
60	Female	64	Better	18	0	18	18503.2
61	Male	51	Better	6	0	6	13717.3
62	Male	71	Better	20	48	68	378472
63	Female	67	Better	12	0	12	16173.2
64	Male	39	Better	16	0	16	15520.3
65	Male	80	Better	19	2	21	43293.4
66	Male	77	Better	117	21	138	516940
67	Female	61	Better	15	0	15	14282.9
68	Male	63	Better	46	16	62	199418
69	Male	57	Better	0	20	20	178691
70	Male	52	其他	1	0	1	3652.29
71	Male	60	其他	7	0	7	14988.6
72	Male	58	Better	9	0	9	13754.5
73	Male	49	Better	17	0	17	19310
74	Male	90	Death / Abandonment	0	27	27	224420
75	Male	80	其他	9	0	9	8714.07
76	Male	68	Better	12	0	12	20379.5
77	Female	53	Better	33	0	33	28155.5
78	Male	22	Better	23	0	23	58541.9
79	Male	16	Better	25	0	25	12730.5
80	Female	62	Better	10	0	10	10510.7
81	Male	63	Better	27	0	27	18752.9
82	Male	64	Better	11	0	11	20472.3
83	Male	46	Better	35	0	35	34180.2
84	Female	78	Death / Abandonment	4	0	4	11388.8
85	Male	54	Better	2	0	2	1636.77
86	Male	64	Better	29	0	29	28498.7
87	Male	55	Better	19	0	19	21922.7
88	Female	56	Better	20	0	20	16523
89	Male	29	Better	13	0	13	8101.59
90	Male	49	Better	23	0	23	39573.8
91	Male	59	Better	2	0	2	2471.05
92	Male	39	Better	19	0	19	21181.7
93	Male	58	Better	10	0	10	14158
94	Male	76	Untreated	25	0	25	33007.1
95	Male	68	Better	28	0	28	27275.4
96	Male	79	Better	8	0	8	9124.66
97	Male	62	Better	8	0	8	10841.4
98	Male	48	Better	19	0	19	22980
99	Male	58	Better	12	0	12	19267.9
100	Female	50	其他	8	0	8	7443.76
101	Male	58	Better	11	0	11	18424
102	Male	27	Better	23	0	23	14724.2
103	Male	32	Better	8	0	8	6059.46
104	Female	74	Better	16	0	16	19288.6
105	Male	73	Better	98	0	98	90140.9
106	Female	61	Better	37	0	37	51212.4
107	Male	63	Better	19	0	19	18556.6
108	Female	55	Better	15	0	15	14630.9
109	Male	64	Better	23	10	33	63985
110	Female	65	Better	9	0	9	7453.88
111	Male	63	Better	90	0	90	63415.8
112	Male	67	Better	21	0	21	24987.8
113	Male	80	Better	17	0	17	25955.2
114	Male	83	Better	0	4	4	20498.8
115	Male	44	Better	8	0	8	6052.61
116	Male	88	治愈	12	0	12	11968.2
117	Male	61	Better	13	0	13	12401.9
118	Male	57	Better	19	0	19	18457.4
119	Male	29	Better	13	0	13	19758.3
120	Male	81	Better	68	0	68	86126.8
121	Male	49	Better	87	0	87	61585.8
122	Male	66	Better	20	0	20	24063.6
123	Male	47	Better	37	0	37	37779.3
124	Male	74	Better	13	0	13	15361.4
125	Male	58	Untreated	20	0	20	38732.2
126	Female	80	Better	13	0	13	16540.8
127	Female	52	Better	39	0	39	15675.8
128	Male	59	Death / Abandonment	0	1	1	31103.6
129	Male	81	Better	15	0	15	21547.2
130	Male	36	Death / Abandonment	0	5	5	31680.7
131	Male	69	Better	11	0	11	18206
132	Male	40	Better	73	0	73	56977.6
133	Female	74	Better	16	0	16	19347.5
134	Male	26	Better	62	0	62	41381.3
135	Male	67	Better	15	0	15	26833.3
136	Male	78	Better	45	0	45	34900.3
137	Male	64	Better	16	0	16	16152.3
138	Female	56	Better	17	0	17	20911
139	Male	58	Better	3	0	3	6190.62
140	Female	60	Better	34	0	34	18559.4
141	Male	58	Better	2	0	2	6015.92
142	Female	80	Better	7	0	7	5166.7
143	Male	51	Better	13	0	13	9442.1
144	Male	69	Better	22	0	22	20582.4
145	Female	71	Better	12	0	12	12836.3
146	Male	76	Better	12	14	26	143814
147	Male	75	Better	11	0	11	18097.6
148	Male	50	Better	46	0	46	29703.7
149	Female	22	Better	19	0	19	9813.48
150	Female	48	Better	19	2	21	30394.3
151	Female	75	Better	8	0	8	19219
152	Female	75	Better	17	0	17	33832.4
153	Male	50	其他	11	0	11	11178.3
154	Male	48	Better	8	0	8	9451.96
155	Male	46	Better	44	0	44	34675.3
156	Male	66	Better	63	0	63	48759.7
157	Male	70	Better	13	0	13	13503.5
158	Male	56	Better	21	0	21	29069.8
159	Male	61	Better	54	0	54	34803.2
160	Male	62	Better	92	0	92	40630.5
161	Male	56	Better	0	5	5	26178.6
162	Male	65	Better	80	0	80	53374.9
163	Male	70	Better	10	0	10	24934.5
164	Male	56	Better	14	0	14	11698.1
165	Female	49	其他	13	0	13	13142.3
166	Male	39	Better	34	0	34	26582
167	Male	66	Better	4	0	4	5417.67
168	Female	68	Better	15	0	15	19507.4
169	Male	52	治愈	18	0	18	21217.9
170	Female	68	Better	29	0	29	23751.1
171	Male	59	Better	26	0	26	18600.8
172	Male	58	Better	19	0	19	28146.2
173	Male	65	Better	23	0	23	16073.6
174	Male	42	Better	28	0	28	46142.7
175	Male	71	Better	14	0	14	35069.3
176	Female	68	Better	26	0	26	41857.6
177	Female	66	Better	18	0	18	24767.6
178	Male	50	Better	14	0	14	16014.4
179	Female	60	Better	13	0	13	11487
180	Female	59	Better	28	0	28	32535.5
181	Male	61	Better	26	0	26	29273.8
182	Male	68	Better	18	0	18	20260.6
183	Female	71	Better	9	0	9	9004.21
184	Male	49	Better	25	0	25	48621.4
185	Male	95	Better	12	0	12	13105.9
186	Female	56	Others	14	0	14	10866.3
187	Male	64	Better	6	0	6	6085.81
188	Male	76	Better	32	0	32	54503.3
189	Male	66	Better	15	0	15	15990.8
190	Male	55	Better	19	0	19	28409.4

## Sheet: Total inpatients
No.	Gender	Age	Treatment results	General ward duration	ICU duration	Total hospitalization duration	Hospitalization cost
717142	Female	77	Better	11		11	16146.9
668230	Male	70	Better	7		7	10535.8
713213	Male	77	Better	21		21	61342.4
721086	Female	83	Better	11	2	13	26413.8
624328	Male	79	Better		22	22	62825.3
718594	Male	59	Better	3	5	8	24335
718635	Female	52	Better	7		7	8936.96
638547	Male	72	Better	7		7	11452.5
718555	Female	60	Better	5	2	7	17612.5
719024	Male	20	Better	4		4	8941.97
707235	Male	69	Better	6		6	5917.46
719054	Female	81	Better	12		12	17202.5
717447	Male	82	Better	10		10	10656.2
719015	Male	82	Better	17	20	37	143182
398963	Male	82	Better	11		11	18821.6
662844	Female	57	Better	13		13	21328.5
116919	Male	100	Death / Abandonment	44	55	99	1.02974e+06
718351	Female	63	Better	6	2	8	18045.6
753404	Male	84	Better	1		1	6925.43
712591	Female	69	Better	3		3	15479.3
718509	Female	60	Better	11		11	20857.5
641795	Male	63	Better	14		14	18891.9
666750	Male	51	Better	36		36	14070
719161	Male	56	Better	7		7	11344.1
509644	Female	56	Better	9		9	8896.78
720321	Male	51	Better	9		9	15617.3
681967	Male	33	Better	2		2	4492.79
720281	Male	58	Better	2		2	3129.69
641519	Female	90	Better	14		14	29745.7
718826	Female	75	Death / Abandonment	12	2	14	38116.7
509652	Male	55	Better	15	5	20	37086.3
714132	Male	73	Better	8		8	7943.41
720301	Female	68	Others	2		2	8887.57
719172	Female	84	Better	12		12	27526.6
719107	Female	69	Better	5		5	16075
719057	Male	61	Better	14		14	30193.7
720282	Female	81	Better	18	6	24	113769
697205	Female	66	Better	21		21	45560.1
719302	Male	67	Better	6		6	10684.9
705218	Male	36	Others	25		25	18538.6
720121	Male	54	Better	16		16	19183.8
720294	Male	72	Others	0	3	3	32533.5
718365	Male	59	Better	11		11	16344.9
501260	Male	43	Better	3	11	14	46695.7
719373	Male	68	Better	13		13	21806.4
615658	Female	56	Better	13		13	27411.1
718897	Male	86	Better	4	22	26	135047
703342	Female	55	Untreated	12		12	18059.7
718907	Male	79	Better	0	20	20	66508.1
718837	Male	22	Better	15		15	11098.2
719203	Male	62	Better	14		14	17841.1
721040	Female	65	Better	24		24	20639.7
718306	Male	68	Better	6	1	7	26588.4
720295	Female	54	Better	3		3	7008.9
718958	Male	84	Better	18	6	24	70296.1
718908	Male	88	Better	11	17	28	146152
718868	Male	57	Better	1	2	3	12603.3
719945	Male	78	Better	9		9	9075.79
566832	Male	60	Better	10		10	13584.1
716958	Male	63	Better	4		4	3963.77
719954	Male	70	Better	9		9	14417.3
690509	Female	65	Better	5		5	10463
711988	Male	82	Better	33		33	40569.9
720056	Female	59	Better	2	3	5	26437.5
709536	Male	65	Better	5		5	10013
349388	Male	76	Better	9		9	14501.4
721231	Male	61	Better	7		7	10575.5
720195	Female	66	Better	4		4	6001.66
719275	Male	88	Better	8	2	10	34936.8
718769	Female	79	Better	12	2	14	28654.4
718338	Male	25	Others	5		5	12173.5
717019	Female	72	Better	11		11	25165.6
706830	Female	65	Better	3		3	7486.41
719937	Female	60	Better	11		11	20104.6
703014	Male	60	Better	15		15	18413.1
317799	Male	74	Better	12		12	9933.98
680932	Male	58	Better	8		8	11476.2
708147	Male	67	Better	3		3	9472.99
716929	Male	86	Better	21		21	29510.7
720479	Female	59	Better	9		9	11837.2
718359	Male	72	Better	19	1	20	28516.7
124578	Male	83	Better	30		30	53812.7
717080	Female	78	Better	8		8	25789.2
720339	Female	62	Better	29	5	34	106877
717832	Female	50	Better	3		3	16729.1
556404	Female	68	Better	10		10	9269.19
718260	Male	85	Better	15	2	17	45746.9
720349	Male	70	Better	9		9	13802.5
702056	Male	63	Better	10		10	13502.1
720711	Male	40	Better	5		5	7320.84
719959	Female	60	Better	8		8	25912.7
719851	Male	51	Better	9		9	16022
719940	Male	30	Better	5		5	10113.5
335672	Female	90	Better	12		12	7084.71
720580	Male	73	Others	6		6	8764.1
719611	Male	81	Death / Abandonment	13	1	14	41885.2
719969	Male	62	Death / Abandonment	5		5	2380.02
720040	Female	61	Better	9	2	11	16204.4
715478	Female	79	Better	18	2	20	37423.2
721691	Male	19	Better	13		13	10960.7
719752	Female	70	Better	7		7	9369.16
715205	Male	45	Better	16		16	22660.4
664910	Female	68	Better	17	4	21	43783.7
743918	Female	52	Others	1		1	16015
721772	Female	75	Better	11		11	12330
721312	Male	66	Untreated	3		3	7257.88
720842	Male	66	Better	13		13	20086
721402	Male	64	Better	10		10	13355.2
556242	Female	76	Better	4		4	8573.2
720090	Male	51	Better	5		5	7241.82
688459	Male	82	Better		11	11	61707.6
720985	Male	92	Death / Abandonment		16	16	90245.8
721632	Male	76	Better	5	5	10	32836.2
721762	Male	46	Better	10		10	12045.5
722391	Female	86	Better	22	3	25	43538
722311	Female	76	Better	12		12	17016
72281	Female	86	Better	23		23	27043.1
718534	Male	83	Better		16	16	93133.6
720733	Female	86	Better	26	19	45	176467
716793	Female	85	Better	10	2	12	30333.5
722222	Female	54	Better	11		11	11406.3
717910	Male	48	Others	4		4	6400.42
481517	Female	60	Better	17		17	25885.4
720864	Male	67	Better	3		3	4722.15
722402	Female	73	Better	12	2	14	35887.7
720944	Male	78	Better	25		25	113117
719753	Female	41	Better	4		4	6224.59
683142	Male	89	Better	7		7	9033.54
719554	Female	61	Better	4	7	11	28628.4
719302	Male	67	Better	7		7	10946.3
720915	Male	33	Others	8		8	14695.6
719864	Male	43	Better	10		10	11363.8
719625	Female	49	Better	4	6	10	28909.2
645047	Male	90	Better	26		26	68600.8
721227	Female	44	Others	10		10	19859
407031	Male	70	Better	14		14	21083.7
719350	Female	63	Better	8		8	7196.72
721726	Male	80	Better	4		4	9389.3
576152	Female	74	Better	14		14	30061.8
721077	Male	57	Better	4	11	15	48806.2
695865	Male	51	Better	12		12	11217.8
695532	Male	50	Better	1		1	3298.57
489020	Male	60	Better	7		7	10385.7
721168	Male	78	Better	10	2	12	19972.3
721637	Male	88	Better	15		15	21582.9
722071	Male	69	Untreated	6		6	9340.02
703501	Female	68	Better	7	5	12	33172.5
722102	Male	28	Better	6		6	8057.93
713263	Male	80	Better	7		7	12947.1
716909	Female	66	Better	22		22	23666.4
722022	Female	74	Others	0	2	2	12181.5
720947	Female	55	Better	6		6	11139.4
500363	Male	76	Better	8		8	17459.4
635023	Male	57	Better	18		18	28951.6
721518	Male	57	Better	14		14	43448.7
722203	Male	76	Better	11	3	14	29155.4
608977	Female	76	Better	9		9	11835.5
721933	Female	51	Better	8	2	10	12560
721719	Male	18	Better	11		11	4698.57
720679	Female	72	Better	7		7	9955.25
719606	Male	57	Better	6	4	10	28518.3
721223	Male	67	Better	20		20	79759.2
719756	Male	81	Better	10		10	12694.5
723002	Male	70	Better	7	5	12	45649.1
722073	Male	46	Better	3		3	7459.98
719587	Female	31	Better	7		7	14746.9
723133	Male	66	Better	2		2	5330.46
427770	Female	75	Better	7	4	11	23353.9
694230	Male	85	Death / Abandonment	10		10	5407.76
719657	Female	71	Better	13	1	14	19616.7
709000	Male	62	Better	13		13	12311.3
423720	Male	76	Better		15	15	48273.2
619612	Male	78	Better	17		17	31736
357244	Male	85	Better	0	11	11	21779.5
557325	Male	72	Others	2		2	6436.74
723371	Male	69	Better	2		2	11622.4
719748	Male	86	Better	10		10	21088.4
723351	Male	22	Better	2		2	7433.23
719678	Male	67	Better	13	8	21	72948.9
312879	Female	56	Death / Abandonment		13	13	89719.8
721996	Female	78	Better	10	2	12	18111.6
722006	Female	74	Better	19		19	29298
324647	Male	56	Better		85	85	207418
719719	Female	56	Better	7	2	9	20696.3
723442	Male	38	Better	5		5	9797.3
712591	Female	69	Better	5		5	11442
719890	Female	48	Better	12	6	18	53613.7
723146	Male	51	Better	9	0	9	9408.48
719799	Female	65	Untreated	1		1	961.56
685134	Male	62	Better	3	5	8	21836.6
719820	Male	56	Better	19		19	18918.1
723694	Male	65	Better	6		6	19532
723804	Male	84	Better	8		8	10917.7
723207	Male	72	Better	19		19	22414.7
721948	Female	45	Better	14		14	19220.2
723058	Female	68	Better	18		18	34673
723965	Male	74	Better	4		4	6701.07
722880	Female	63	Better	0	1	1	5415.05
551545	Female	86	Better	2	22	24	166397
691752	Male	80	Better	15		15	38588
723696	Female	78	Better	13	3	16	30596.2
703392	Male	64	Better	17		17	22649.2
722810	Male	75	Better	7		7	8237.36
722427	Male	26	Better	5		5	4217.2
723906	Male	54	Better	5		5	8081.66
722357	Male	57	Better	9	2	11	23747.2
722377	Female	60	Better	16	11	27	120366
723727	Female	75	Better	10	4	14	31789.2
662844	Female	57	Better	10		10	14679.3
724067	Male	60	Better	7		7	12845.5
635977	Female	51	Better	11		11	14392.1
723958	Male	44	Better	7		7	4493.18
723747	Male	73	Better	8		8	14126.3
717832	Female	50	Better	7		7	16913.7
722348	Male	75	Better	0	2	2	12284.6
718509	Female	60	Better	7		7	10706.9
723857	Male	34	Better	1		1	3886.6
723406	Female	72	Better	8		8	12281.2
723060	Male	80	Better	15		15	15166.5
604145	Female	72	Better	4	6	10	39749.4
666962	Female	72	Death / Abandonment	10		10	22243.7
716889	Male	70	Untreated	12		12	22501.9
706830	Female	65	Better	2		2	7885.8
700001	Male	54	Better	7		7	8643.38
723477	Male	89	Better	11		11	15588.2
274146	Female	42	Better	17		17	10017.9
724701	Female	80	Better	5	2	7	19874.9
721800	Male	73	Better	4		4	8827.22
677955	Female	71	Better	14		14	25972.8
672117	Male	84	Better	10		10	31367.6
709536	Male	65	Better	4		4	6598.81
716365	Female	81	Death / Abandonment	25		25	52144.4
722752	Female	56	Better	8		8	11505.5
723608	Male	81	Better	1		1	9916.21
716316	Female	78	Better	11		11	14673.5
724482	Male	54	Better	7		7	12849.8
679598	Male	63	Better	13		13	29782.2
722369	Male	83	Better	9		9	20877.4
722349	Male	65	Better	13	8	21	88243.9
722379	Male	73	Better	8	1	9	18212.9
651867	Female	59	Better	7	1	8	14728.5
724283	Male	58	Better	7		7	12313.8
715614	Male	68	Better		8	8	37546.7
724303	Male	43	Others	2		2	13984.1
724253	Male	84	Better	18	5	23	71969.5
723469	Male	22	Better	11		11	22549.4
723840	Female	59	Better	11		11	20795.6
723359	Male	69	Death / Abandonment	4	66	70	353714
724405	Male	45	Better	7		7	10038.4
722694	Male	70	Better	8	2	10	21779.5
724094	Male	52	无效	9		9	9364.3
724446	Male	34	Better	20		20	15552.2
725571	Male	80	Better	0	2	2	9382.89
723640	Male	86	Better	0	8	8	57277.8
723669	Male	60	Better	10		10	14015.4
659255	Female	59	Better	5		5	6900.37
623044	Male	72	Better	11		11	22929.6
724186	Male	46	Better	31		31	24908.3
722924	Female	88	Better	7		7	17224.8
722894	Male	65	Better	21		21	29672.3
724106	Female	85	Better	9		9	11525.3
724157	Male	68	Others	1		1	2763.26
719753	Female	41	Better	4		4	5871.35
724812	Female	50	Better	8		8	5347.14
589634	Female	50	Better		7	7	64733.5
722390	Female	56	Better	5	1	6	16296
708147	Male	67	Better	4		4	9514.17
407195	Female	57	Better	8		8	10995.3
724227	Male	67	Better	17		17	28559.1
516246	Female	81	Better	0	28	28	146851
521001	Female	54	Others	8		8	32167.1
722755	Female	59	Better	1	5	6	24147.3
722836	Male	76	Better	12		12	57292.7
724108	Male	76	Better	14	3	17	37029.6
388248	Female	79	Better	7		7	14473.4
724438	Female	64	Better	11	2	13	27010.5
724963	Male	74	Better	5		5	6851.24
724824	Male	80	Better	5		5	6091.96
724873	Female	63	Better	6		6	14838.5
725443	Male	81	Better	5		5	7313.41
724983	Female	61	Better	3		3	3550.49
725493	Female	75	Better	7		7	10261
666750	Male	51	Better	21		21	7512.89
722646	Male	52	Untreated	6		6	15701.2
722200	Male	65	Better	27		27	29449.3
722867	Female	71	Better	6		6	17054.1
468383	Male	70	Better	2	5	7	28450.2
634111	Female	50	Better	5		5	7142.94
724279	Male	68	Better	0	3	3	15789.3
124578	Male	83	Death / Abandonment	26		26	38096.4
725701	Female	76	Better	13		13	17561.9
720349	Male	70	Better	27		27	36532.6
595659	Female	85	Better	3	2	5	17352.8
408230	Female	83	Better	6		6	8227.28
5257156	Male	84	Better	15	13	28	88232.4
724289	Male	69	Better	19	9	28	174496
724249	Female	76	Better	12	11	23	132046
724359	Male	61	Better	4		4	6397.26
725344	Female	64	Better	12		12	31092.5
722677	Male	83	Better	4		4	4439.44
724974	Male	66	Better	8		8	35155.4
706952	Male	53	Better	3		3	4857.74
724109	Female	51	Better	4		4	4144.6
602949	Male	51	Better	18		18	29156.1
724320	Male	64	Better	21		21	27921.9
725154	Female	63	Better	0	2	2	14588
724370	Male	86	Better	12		12	13251.3
724230	Female	48	Better	20	2	22	28542.5
718179	Female	85	Better	18		18	24238.8
724200	Male	64	Better	12		12	17219.7
641519	Female	90	Better	26		26	51259.8
724865	Female	80	Better	10		10	17115.8
723139	Male	57	Death / Abandonment	27		27	48942.3
722627	Male	75	Death / Abandonment	7	32	39	235253
724288	Female	85	Better	8	3	11	32004.6
614871	Male	56	治愈	14		14	8438.53
724985	Male	36	Better	4		4	8254.72
619413	Female	85	Better	13		13	26962.2
722647	Male	89	Death / Abandonment	6	10	16	91131.9
723394	Male	73	Better	10	6	16	43010.7
724925	Male	78	Better	11		11	20258.9
724945	Male	84	Better	16		16	28289.5
725085	Male	80	Better	12		12	17550.1
725862	Male	85	Better	13		13	22018.3
722748	Female	58	Better	14		14	14090.5
725772	Female	76	Better		21	21	116984
722818	Male	82	Better	6	6	12	36270.9
672117	Male	84	Better	11		11	16935.4
722658	Female	59	Better	12		12	12194.4
434519	Male	75	Better		5	5	49453.3
725166	Male	54	Better	14	3	17	48081.5
725823	Male	59	Better	12		12	14694.3
349824	Female	78	Better	13		13	15030.4
661700	Male	72	Better	10	3	13	39283.7
725964	Male	75	Better	8	4	12	34481.9
724976	Female	84	治愈		26	26	88255.4
725683	Female	73	Better	5		5	10152.8
726102	Male	85	Better	2		2	3626.38
716138	Female	71	Better	10		10	19659.4
726201	Male	69	Better		7	7	39720.3
711360	Male	29	Better	6		6	9441.54
726002	Female	80	Better	10		10	19243.2
686977	Male	68	Better	12		12	25732.7
725107	Male	71	Better	9	1	10	19752.2
612355	Male	68	Better	17		17	23980.5
724987	Female	73	Better	9		9	30995.1
710673	Male	81	Better	7		7	10302.8
566832	Male	60	Better	12		12	13609.5
640260	Female	81	Death / Abandonment	5	5	10	43128.4
725057	Female	87	Better	10		10	16140.1
648115	Female	84	Better	10		10	15363.4
725287	Female	77	Better	15		15	36475.9
717832	Female	50	Better	8		8	20792.5
714267	Male	57	Better	9		9	10723.4
727661	Female	63	Better	25	5	30	75449.3
724889	Male	69	Better	9		9	16619.7
718509	Female	60	Better	6		6	12095.4
725246	Female	41	Better	2		2	5255.85
643273	Male	62	Better	16		16	22275.5
726104	Female	83	Better	6	2	8	18652
725576	Male	48	Better	36		36	55636.4
727681	Male	79	Better	9		9	11126.4
725199	Female	65	Better	18	1	19	30245.4
727771	Male	50	Better	13		13	21099.5
726123	Male	39	Others	2		2	11228.5
671288	Female	30	Better	8		8	13603.9
658219	Male	66	Better	15		15	24632.3
642638	Male	87	Better	5	3	8	25163.9
715713	Female	90	Better	14	1	15	23718.3
715702	Male	57	Better	10	1	11	12746.4
712591	Female	69	Better	4		4	9589.16
727632	Female	77	Better	12	4	16	39414.5
726237	Female	24	Better	5		5	8685.34
725796	Female	34	Better	7		7	1397.95
725520	Male	55	Better	10		10	9735.77
727493	Male	76	Better	9	1	10	22695.4
725590	Female	27	Better	10		10	7805.74
727832	Male	48	Death / Abandonment		11	11	67961
726982	Female	82	Better	14		14	18065.6
724253	Male	84	Better	12		12	11694.6
497051	Female	90	Death / Abandonment	4	10	14	56028.6
640875	Female	75	Better	8		8	12490.3
724568	Male	61	Better	12		12	14813.9
695310	Male	63	Better	12		12	19037.6
727773	Female	52	Better	16	4	20	49543
724648	Male	58	Better	13		13	22092.8
303722	Male	33	Better	40		40	10669.3
726298	Male	75	Better	12		12	16467.6
546540	Female	72	Better	15		15	39046.7
724638	Male	64	Better	13		13	19448.8
726208	Male	85	Better	18	9	27	92736.9
627172	Male	75	Better	21	5	26	84655.6
727291	Female	63	Better		37	37	269728
636895	Male	63	Others	4		4	14837.1
726844	Male	68	Better	7		7	8078.63
719753	Female	41	Better	5		5	8142.34
592008	Female	75	Better	14		14	27291.6
706830	Female	65	Better	2		2	7654.22
726825	Male	84	Better	10		10	15828.5
727595	Male	70	Better	6		6	9982.65
666750	Male	51	Better	21		21	9594.98
727423	Female	57	Better	17		17	19080.8
727686	Male	44	Better	9		9	31859.4
727546	Male	82	Better	17		17	33052.2
727035	Male	62	Better	5	2	7	19913.7
727324	Female	63	Better	9		9	5025.18
671442	Male	71	Better	13		13	10355.3
690509	Female	65	Better	6		6	14935.7
725828	Female	83	Better	12	9	21	86420
549684	Female	76	Better	29	9	38	137285
727637	Female	54	Better	9		9	9690.63
396477	Male	80	Better	29		29	53160.6
727225	Female	26	Better	16		16	19527.2
587447	Male	68	Better	7	13	20	94917.5
726691	Male	64	Better	4		4	10601.9
757574	Female	66	Better	7		7	6382.03
584956	Male	56	Better	3		3	7703.13
726421	Female	77	Better	5		5	8506.11
727738	Female	70	Death / Abandonment		4	4	29006.8
726957	Male	59	Better	11		11	9275.06
390766	Male	75	Death / Abandonment	12		12	31637.2
726441	Female	84	Better	14		14	22187.9
727098	Male	82	Better	7		7	19763.4
717793	Male	79	无效	3		3	7472.36
663824	Female	74	Better	11		11	23559.8
726809	Female	59	Better	7		7	6272.93
727069	Female	87	Better	12	6	18	52513.8
726919	Male	91	Better	17		17	26304.6
727080	Male	71	Better	13	2	15	26249.1
596822	Male	78	Better	12		12	15535.4
331103	Female	84	Better	5		5	14359.1
727397	Female	60	Better	8		8	14338.5
727876	Male	65	Better	11		11	18753.9
725609	Female	33	Better	12		12	6098.46
699357	Female	77	Better	42		42	102074
726553	Female	59	Better	6	3	9	30113.3
485576	Male	76	Better		30	30	113989
727690	Female	70	Better	15		15	21844.5
521780	Male	75	Better	21		21	22425
728941	Female	52	Better	3		3	2963.64
728861	Male	72	Untreated	5		5	13293.8
728981	Female	78	Better	11		11	13185
728901	Female	29	Better	25		25	15973.3
672932	Female	67	Better	14		14	16473
726424	Male	58	Better	9	1	10	15276.6
727329	Male	47	Better	18		18	16018.3
728008	Female	54	Better	6		6	5196.38
317874	Female	77	Better	17		17	18539.1
728189	Male	88	Better	7		7	11370.4
726664	Male	83	Better	9		9	16187.9
727978	Male	58	Better	14		14	18621.5
729431	Female	66	Better	9	3	12	41731.9
728745	Male	78	Others		7	7	75226.8
728833	Female	52	Better	8		8	9433.29
620453	Male	62	Better	8		8	12859
571283	Male	78	无效	16		16	35738.5
725830	Male	55	Better	16		16	20173.7
728572	Male	63	Better	17	2	19	24187.7
645047	Male	90	Better	19		19	39981.4
728854	Male	46	Better	9		9	7592.77
728180	Male	61	Better	9		9	3122.06
729961	Male	35	Better	6		6	8431.11
333412	Male	81	Untreated	8		8	10942.5
421036	Female	57	Better	24		24	25216.2
729941	Male	80	Better	13		13	22936.8
726455	Male	71	Untreated	2		2	2122.4
728594	Male	64	Better	13		13	20240
729922	Male	72	Better	6	2	8	23035.3
728593	Male	41	Better	11		11	19690.1
524320	Female	82	Better	15		15	26865.6
213335	Female	80	Better	28		28	21770.9
730043	Female	75	Better	6	4	10	26534
729502	Female	44	Better	7		7	8543.5
729442	Female	64	Better	13	1	14	25883.7
728374	Male	52	Better	4		4	8870.05
729103	Female	88	Better	7		7	15422.3
726697	Male	68	Better	17		17	27853.3
728676	Male	20	Better	13		13	4845.83
624328	Male	79	Better		27	27	89591.5
729732	Male	79	Better	0	1	1	1730.82
729853	Male	73	Better	13		13	26294.6
387391	Female	67	Better	22		22	23318.5
19540210	Male	61	Better	5		5	8399.05
728305	Male	68	Better	4		4	4537.63
729013	Female	63	Better	45		45	47433.4
729054	Female	83	Better	4		4	11771.6
728345	Male	47	Better	15		15	19234.4
709281	Female	70	Better	24		24	39112.7
726638	Female	45	Better	3		3	5775.93
729643	Female	65	Better	11	4	15	35920.2
730133	Female	49	Better	10		10	12187
7273	Male	55	Better	14		14	18698.5
660657	Male	55	Others	1	6	7	23462.8
726628	Male	47	Better	3		3	4712.86
726429	Male	48	Better	11		11	17594
729503	Male	83	Untreated		2	2	28942.7
729777	Female	72	Others	7		7	12134.7
728546	Male	52	Better	6		6	8258.63
729066	Male	61	Better	6		6	11619.1
728850	Female	87	Better	0	8	8	47798.4
729403	Female	74	Better		5	5	18179.7
729937	Female	33	Better	5		5	4883.1
728588	Male	55	Better		1	1	6845.7
728357	Male	71	Better	0	5	5	17900
730117	Female	77	Better	8		8	7615.49
609041	Male	81	Better	16		16	29174.5
730038	Male	51	Better	13		13	23779
730152	Male	71	Better	7		7	8502.89
729809	Male	52	Better	8		8	17474.6
729979	Male	82	Better	43	7	50	107922
493221	Male	55	Better	15		15	8554.55
569204	Female	65	Untreated	7		7	17071.5
729744	Female	33	Better	8		8	27636.2
730069	Male	63	Better	11		11	15674.1
729664	Male	60	Better	8		8	65722.5
730153	Male	84	Better	10		10	11211.2
322943	Male	60	Better	10		10	6065.48
612355	Male	68	Better	13		13	27376.8
729554	Female	75	Better	11	5	16	43565.3
730173	Male	37	Better	10		10	14699
730150	Male	79	Better	0	1	1	5193.24
728339	Male	31	Better	18		18	28703.5
730641	Male	77	Better	10		10	13400.4
731381	Male	76	Better	16		16	29260.3
675595	Female	76	Better	19		19	24511.4
341962	Male	42	Better	13		13	17178
729394	Female	86	Better	5		5	9930.59
459429	Female	78	Better	10	3	13	37607.9
729555	Female	45	Better	10		10	9606.86
730204	Male	64	Better	13	3	16	32945.8
653154	Male	34	Better	12		12	5901.56
730804	Male	47	Better	11		11	13780
730495	Male	74	Better	4		4	15892.6
730753	Female	49	Untreated	3		3	12486
729149	Male	79	Better	10		10	17673
350181	Male	82	治愈	14		14	20041.6
731364	Male	51	Better	16	12	28	172867
731645	Male	57	Better	9		9	5993.41
731236	Female	82	Better	9	6	15	24665.5
345294	Male	84	Better	9		9	14060.5
731314	Male	59	Better	14		14	19242.4
730634	Female	84	Better	15	2	17	57453.4
731365	Male	55	Better	12		12	22074.6
719753	Female	41	Better	5		5	6854.54
730417	Male	72	Better	6	7	13	42277.9
724889	Male	69	Better	2		2	6640.52
641711	Male	81	Better	9		9	10667.7
732641	Male	80	Better	10	5	15	47387.1
729686	Female	68	Better	9		9	13712.4
730297	Male	28	Better	5		5	9284.2
729290	Male	60	Better	8		8	20064
712591	Female	69	Better	5		5	10397.7
719938	Male	61	Better	22		22	35518.8
730438	Male	64	Better	13		13	17484
706830	Female	65	Better	2		2	3821.13
695532	Male	50	Better	2		2	3976.89
730309	Male	67	Better	9		9	11815.4
625630	Female	84	Death / Abandonment	20	1	21	69166.8
409395	Female	77	Better	8		8	11436.1
731273	Male	64	Better	110		110	15387.6
731639	Male	82	Better	14		14	11444.1
730647	Male	57	Better	10		10	15961.8
732682	Female	82	Better	7		7	11784.5
730190	Male	79	Better	12		12	13933.8
724701	Female	80	Better	9	3	12	21577.7
729727	Female	63	Better	13		13	15002.6
729717	Male	24	Better	10		10	5517.43
729737	Male	84	Better	13		13	24926.6
730708	Female	57	Better	32	2	34	122189
730280	Female	58	Better	6		6	9968.11
731529	Female	67	Better	3	7	10	21073.3
730954	Female	54	Better	23		23	15690
452772	Female	80	Better	11		11	12030.5
731329	Female	75	Better	18		18	27466
731550	Male	70	Better	11		11	18345.3
729457	Male	40	Better		12	12	91150.7
490704	Male	76	Better	7		7	8550.75
303039	Male	73	Better	8	9	17	79061.9
732231	Female	74	Better	10		10	13195.7
733411	Male	87	Better	11	3	14	72592.4
733251	Male	81	Better	15		15	25081.7
733391	Male	51	Better	11		11	8171.33
726455	Male	71	Better	5		5	7679.26
733311	Male	85	Better	16	6	22	76493.1
641519	Female	90	Better	15		15	18718.4
733202	Female	60	Others	11		11	6976.18
730955	Male	58	Better	14		14	29640.8
731075	Female	52	Better	2		2	21616.6
666750	Male	51	Better	20		20	7356.65
732193	Male	90	Better	8		8	10956.6
732333	Female	61	Better	14		14	14924.5
729639	Male	76	Better	6	2	8	18526.3
345741	Female	87	Better	9		9	11612.3
732435	Female	69	Better	15		15	14925.2
731007	Male	56	Better	2		2	10475.9
731118	Male	56	Better	9	3	12	25241.7
457501	Male	65	Better	7		7	13454.8
322227	Male	72	Better	12		12	15908.7
732215	Male	86	Death / Abandonment	19		19	50579.5
732736	Male	51	Better	12		12	15952.6
732185	Male	64	Better	12		12	10892.1
731149	Male	27	Better	8	12	20	110898
733305	Male	66	Better	11		11	14191.9
729429	Male	73	Better	12	3	15	24896.2
576661	Female	68	Better	17		17	16388.3
732226	Male	81	Better	6	7	13	69362.4
731019	Female	19	Better	27		27	10102.8
727069	Female	87	Better	1	9	10	36537.3
732146	Female	70	Death / Abandonment	16		16	34784.8
732246	Female	78	Better	11		11	23273.3
686977	Male	68	Better	21		21	40645.7
733242	Male	68	Better	5		5	21971.2
732386	Male	52	Better	11		11	11036.1
733197	Male	87	Better	17	2	19	26510
733455	Male	60	Better	12		12	13697.7
729640	Female	73	Better		25	25	168783
729530	Male	68	Better	20	3	23	57713.2
720349	Male	70	Better	4		4	8118.85
731250	Male	81	Better	13	3	16	58086.7
733537	Female	92	Death / Abandonment		4	4	40826.7
535787	Male	78	Better	9		9	16117.9
714132	Male	73	Better	17		17	29055.6
498625	Female	70	Better	20		20	34487.6
386216	Male	80	Better	17		17	14398.9
732780	Male	67	Better	11	2	13	29425.4
732279	Male	71	Better	13		13	31656.5
732569	Male	87	Better	20		20	30200.1
733952	Female	68	Untreated	3		3	10464.4
732199	Male	68	Better	7		7	12600.4
733505	Male	51	Better	1		1	7833.46
732599	Male	80	Better	8		8	10487.3
639698	Male	52	Better	14		14	21236
7.5101	Female	77	Better	13		13	14602.6
734612	Male	67	Better	12		12	13799.5
597388	Male	64	Death / Abandonment	34		34	178181
347004	Female	75	Better	10	2	12	25469
734552	Female	61	Better	6		6	7346.29
734483	Female	75	Better	14		14	15061.4
732932	Male	56	Better	1	1	2	4876.44
733320	Male	87	Better	5	6	11	43093.4
733329	Male	72	Better	8		8	8128.33
690509	Female	65	Better	21		21	50650.2
734771	Male	51	Better		4	4	23205.4
735071	Female	74	Better	3	4	7	25721.5
735032	Female	63	Better	28		28	40743.9
734334	Female	72	Better	27		27	27533.7
734504	Male	84	Better		29	29	172086
734871	Male	51	Better	18		18	34007
664910	Female	68	Better	12	2	14	26917.2
733132	Female	81	Others	0	1	1	8865.8
671024	Female	84	Better	13		13	14077.2
734384	Male	20	Better	8		8	9164.15
631898	Male	72	Better	12		12	19334.6
478926	Female	73	Better	20		20	43894.9
735782	Male	71	Better	7		7	7491.62
735682	Female	77	Better	12		12	14964
735264	Male	61	Better	11		11	27064.9
734294	Female	56	Death / Abandonment		1	1	12105.6
734644	Female	64	Better	9	3	12	25413.6
734822	Male	66	Better	5		5	6737.11
734244	Male	63	Better	13		13	18331.6
734983	Female	73	Better	18		18	32647.3
734963	Male	51	Better	13		13	20442.7
734164	Female	86	Death / Abandonment		1	1	3731.32
354462	Male	70	Better		25	25	117744
732914	Male	31	治愈	10	4	14	35626.6
734955	Female	65	Better	9		9	7662.79
734925	Male	71	Better	11	3	14	48335.6
734905	Male	75	Better	7	1	8	15537.7
735654	Male	53	Better	13		13	11852.4
735374	Male	55	Better	10		10	6787.06
734036	Male	86	Better	14		14	21371.6
734046	Male	34	Better	8		8	14839.2
733996	Female	33	Better	7		7	4749.68
732844	Female	75	Better	20	2	22	46369.9
685134	Male	62	Better	8		8	12718.7
645047	Male	90	Better	15		15	16891.2
684652	Male	75	Better	11		11	16359.9
734607	Male	68	Better	8	3	11	33232.5
735137	Female	71	Better	14		14	28451.8
735107	Male	59	Better	8		8	15587.6
734447	Male	73	Death / Abandonment	16		16	29743.6
734527	Female	88	Better	5	2	7	23622.7
734136	Female	80	Better	9		9	12783.5
724889	Male	69	Better	2		2	4287.77
734858	Male	59	Better	11		11	15714.6
376076	Female	84	Better	14		14	14713.3
734868	Male	83	Better	24	1	25	56867.8
735229	Female	80	Better		1	1	5081.78
734338	Male	42	Better	12		12	17369
702125	Male	67	Better	6	13	19	119137
734087	Male	47	Better	9	5	14	33850.6
732975	Female	64	Better	11	3	14	35277.4
735806	Male	52	Better	7		7	7450.37
735370	Female	80	Better	25	3	28	26143.2
734859	Male	57	Better	5	2	7	11354.1
548595	Male	72	Death / Abandonment	7	13	20	65688.2
590981	Male	90	Better	18		18	24873.6
734759	Male	69	Better	7		7	13530.9
734849	Female	57	Better	11	2	13	21451.7
662108	Female	74	Better	25		25	25754.4
472147	Female	74	Better	15		15	36573.2
736491	Male	75	Better	11		11	30886.9
736661	Female	83	Better		9	9	34645.1
489103	Male	77	Better	12		12	22010.8
735861	Male	32	Better	23		23	20332.2
735738	Male	89	Better		8	8	52122.6
736583	Female	68	Better	4		4	5942.58
736961	Male	62	Better	3		3	4433.66
736931	Male	59	Better	6		6	13486.2
736692	Male	91	Death / Abandonment		6	6	41100.8
736423	Female	43	Better	10		10	13816.9
566437	Female	71	Better	0	1	1	6270.2
269976	Female	78	Better	10		10	9816.09
733077	Male	81	Better	8	2	10	18986.5
666750	Male	51	Better	28		28	9639.05
736853	Male	73	Better	7		7	3632.47
736524	Male	55	Better	8		8	9625.19
736494	Male	59	Better	8		8	9469.43
736404	Female	77	Better	8		8	10881.6
697627	Male	74	Better	0	9	9	41682.8
718509	Female	60	Better	5		5	7501.87
500363	Male	76	Better	2		2	4577.6
736295	Male	48	Untreated	7		7	9953.93
736754	Female	82	Untreated	13		13	21760.9
735730	Female	77	Better	24		24	26113.6
345074	Male	58	Better	8		8	6548.27
734290	Male	56	Untreated	7		7	11270.1
734220	Male	67	Better	13		13	19620.8
597931	Male	75	Better	8		8	12626.6
616028	Female	77	Better	12		12	14744
378114	Female	57	Better	7		7	4004.92
737211	Male	85	Better	3	4	7	29846.8
735884	Male	86	Others	13		13	16327.6
324647	Male	56	Better		33	33	75668.1
737721	Male	47	Better	7		7	10701.8
736626	Male	73	Better	7		7	12119.1
736527	Female	78	Better	11		11	10638.2
736336	Male	59	Better	4	3	7	17343.8
590099	Female	76	Better	10		10	13385.8
549776	Female	58	Better	21		21	32753
724032	Female	75	Better	7		7	9164.51
397047	Female	70	Untreated	0	1	1	9452.18
736896	Male	63	Others	12		12	17417.7
736418	Male	79	Better	14		14	32860.3
736338	Male	71	Better	7		7	10959.4
540392	Female	64	Better	24		24	27405.4
661839	Male	79	Better	11		11	18099.8
489020	Male	60	Better	5		5	8139.97
319415	Male	97	Better	5		5	7708.72
394068	Male	78	Better	15		15	20028.1
732960	Female	43	Better	22	1	23	20526
732819	Male	55	Better	5		5	12428.6
489037	Female	79	Better	1		1	1577.28
737861	Female	66	Better	8		8	14114.8
737551	Male	77	Better	3		3	18114.8
737491	Male	76	Death / Abandonment		12	12	110461
736959	Male	63	Better	14	3	17	45752.6
736580	Male	57	Better	2		2	11768.2
736550	Male	66	Better	13	2	15	99970.2
345741	Female	87	Better	14		14	27391
566832	Male	60	Better	25		25	28718.5
732839	Male	39	Better	6	2	8	19633.2
275706	Female	44	Better	50		50	29013.8
676012	Male	71	Better	8	3	11	22230.6
518265	Male	76	Better	2	10	12	47110.1
631244	Male	69	Better	10		10	14167.2
502390	Male	81	Better	1		1	4299.21
737852	Male	86	Better	8	2	10	23970.5
737832	Female	72	Better	1		1	3927.89
738351	Female	66	Others		6	6	24395.7
738042	Female	79	Better	9		9	13718.3
641519	Female	90	Better	26		26	38357.9
736016	Female	52	Better	5		5	4633.36
738221	Male	69	Better	7		7	7733.16
738401	Female	76	Better	17		17	25870.7
738112	Female	74	Better	5		5	6665.93
738081	Male	59	Better	13	2	15	24144.3
737582	Female	74	Better	36	2	38	26541.3
737972	Male	89	Better		13	13	120017
735382	Female	59	Better	16		16	18165.4
523639	Male	59	Better	14	8	22	50865.6
724879	Male	81	Better		19	19	102823
737973	Male	71	Better	11		11	15074.3
737933	Male	70	Better	7		7	11300.5
737307	Female	51	Better	6		6	6086.86
737257	Female	65	Better	5		5	8150.75
737623	Male	73	Others	4		4	6464.31
737158	Male	79	Better	10		10	20019.2
737058	Male	78	Better	11		11	21031.6
736037	Male	78	Better	13		13	16329.9
409395	Female	77	Better	10		10	11935.8
737503	Male	73	Better	15	2	17	40607.7
727069	Female	87	Better		11	11	56760.6
498401	Female	73	Better	8		8	11894.3
737854	Male	61	Better	18		18	29685.8
737754	Male	74	Death / Abandonment		7	7	75095.2
737703	Male	73	Better	13		13	8697.64
735920	Male	74	Better	0	8	8	42207.3
717832	Female	50	Death / Abandonment	9		9	25075.7
738044	Female	51	Better	15		15	12848.8
434534	Female	76	Better		11	11	32915.5
433100	Male	58	Better	17	2	19	29736.9
521072	Female	59	Better	12		12	16938.4
562147	Female	63	Better	9	8	17	60646.5
739612	Female	26	Better	14		14	12626.8
717142	Female	77	Better	18		18	23104.5
737975	Male	28	Better	7		7	6815.21
737565	Female	61	Better	9		9	11720.2
737536	Female	77	Better	30	10	40	14583.9
737466	Male	80	Better	8		8	19096.8
737376	Female	63	Better	4		4	10454.9
737149	Male	60	Better	3		3	16727.5
736029	Female	75	Better	9		9	12610.1
736019	Female	46	Better	9		9	10758.8
735968	Female	50	Better	0	1	1	1927.54
739383	Female	55	Better	10		10	18354.5
739293	Male	65	Better	9		9	8767.94
737736	Male	41	治愈	8		8	7658.88
737706	Male	52	Others	3		3	1738.72
737477	Male	33	Better	30		30	39741.5
736100	Male	57	Better	10	10	20	98938.1
739283	Female	64	Better	20	2	22	19367
684652	Male	75	Better	10	5	15	35860.7
739544	Male	61	Better	13		13	11642.7
738068	Female	67	Better	5		5	4397.96
737828	Male	75	Better	12		12	11455.8
737727	Female	44	Better	8		8	6505.14
737090	Male	34	Better	9		9	11085.8
736180	Male	67	Better	9		9	13584.3
702844	Female	70	Better	13	1	14	23671.1
688392	Female	60	Better	12		12	31764.2
700297	Female	58	Better	11		11	11301.2
634111	Female	50	Better	19		19	21619.1
726971	Male	61	Better	14		14	18083.4
739535	Male	45	Untreated	4	4	8	25627.7
739425	Male	53	Better	9		9	17271.7
639554	Female	76	Better	0	1	1	8095.91
724253	Male	84	Better		8	8	37394.9
738642	Male	59	Better	7		7	10441.6
737760	Male	57	Better	5		5	24535.5
737559	Female	20	Better	14		14	45522.7
734244	Male	63	Better	18		18	25481.7
690509	Female	65	Death / Abandonment	34		34	75924.4
738692	Female	77	Death / Abandonment		1	1	8517.84
739567	Male	74	Better	9		9	13142.5
739557	Male	53	Better	12		12	23703.1
738375	Male	70	Better	9	3	12	30500.3
339475	Male	58	Others	8		8	7835.77
739112	Male	64	Better	7		7	11711.8
739608	Male	66	Better	4		4	5753.73
739102	Male	44	治愈	3		3	6127.93
738763	Male	78	Better	7		7	5761.01
738743	Male	52	Better	14		14	28538.2
706830	Female	65	Better	2		2	4101.65
730038	Male	51	Better	8		8	8538.89
739943	Male	76	Better	8		8	10653.7
620821	Male	55	Better	8		8	11122.1
561240	Male	79	Better	10	5	15	45279.6
612625	Male	82	Better	14		14	19407.3
739695	Male	56	Better	6		6	9519.08
612355	Male	68	Better	12	3	15	26045.4
740043	Female	64	Others	1		1	7341.3
739263	Male	61	Better	10		10	12852
738506	Male	72	Better	4	2	6	9076.19
739164	Female	88	Death / Abandonment	32		32	58333.2
614785	Male	52	Better	8	1	9	15870.7
609119	Female	80	Better	6	3	9	21248
739954	Male	35	Better		2	2	10541.9
739884	Male	72	Better	13		13	11332.9
739390	Female	57	Better	8		8	11026.3
739244	Female	33	Better	5		5	7391.43
739124	Male	33	Others	3		3	12883.3
738975	Female	52	Others	1		1	3815
738935	Female	57	Better	7		7	11632
431775	Male	80	Better	8	8	16	58949.5
727080	Male	71	Better	10	2	12	28475.7
498625	Female	75	Better	7		7	5820.36
739995	Female	84	Death / Abandonment		11	11	84825.9
627578	Female	67	Better	11		11	13210.3
739975	Male	60	Untreated	33		33	24107.1
739225	Female	77	Better	27		27	43973.2
739095	Female	43	Better	12		12	16460.1
739675	Male	24	Better	10		10	4297.19
739658	Male	82	Death / Abandonment	6		6	12726.9
740274	Male	62	Better	10		10	14098.9
739186	Male	47	Better	3		3	6903.64
738847	Male	63	Better	19		19	24787.7
738237	Male	66	Better	16	3	19	38844
738217	Male	18	Better	4		4	2394.02
738197	Female	72	Better	12		12	13426.3
735996	Male	84	Better	21		21	52009.3
724873	Female	63	Better	10		10	17219.3
679598	Male	63	Death / Abandonment	9		9	17151.5
704482	Male	81	Better	6		6	10526.6
740285	Female	19	治愈	13		13	11738.3
739217	Male	60	Better	8		8	14899.5
738427	Female	60	Better	6	2	8	21621.1
731798	Male	78	Better	9		9	9629.44
741613	Female	82	Better	14		14	25868.2
739767	Female	79	Better	8		8	10593.8
375956	Male	67	Better	4		4	9956.23
738949	Female	64	Better	9		9	13778.6
592008	Female	75	Better	0	5	5	20892.9
734220	Male	67	Better	8		8	16733.5
732599	Male	80	Better	9		9	9823.41
666750	Male	51	Better	42		42	13234.2
741773	Male	43	Better	31		31	35734.8
741161	Male	64	Better	14		14	24170.5
740107	Male	60	Better	10		10	20543.7
686977	Male	68	Better	8		8	20642.3
516246	Female	81	Better		14	14	50122.7
423151	Female	74	Better	20		20	33587.3
740942	Female	18	Others	2		2	5112.66
741864	Male	46	Better	8		8	17190.3
741895	Female	57	Better	14		14	14224.9
738849	Male	74	Better	9		9	17856.3
738809	Male	86	Better	7		7	8509.65
579398	Male	81	Better	6	6	12	54033.6
740771	Male	59	Better	8	6	14	37237.5
740591	Male	66	Better	18	2	20	28161.1
739780	Male	41	Better	4	1	5	12820.2
739760	Female	66	Better	0	2	2	10956.9
739670	Male	60	Better	12		12	9275.95
738509	Female	75	Better	11		11	17525.7
738409	Female	65	Better	8		8	10248.6
740541	Male	53	Better	1		1	3719.28
740752	Male	34	治愈	13		13	13038.3
740239	Female	22	Better	9	2	11	21286.4
741171	Male	65	Untreated	19	13	32	11092.9
740863	Male	68	Better	14		14	12585.5
740702	Male	24	Better	5		5	2469.67
738349	Male	75	Better	6		6	15819.9
624328	Male	79	Better		14	14	54748.1
740783	Male	89	Better	10	3	13	2146.81
740260	Male	19	Others	3		3	3570.44
740200	Female	62	Better	13	4	17	48363.5
742331	Female	61	Better	2		2	4730.33
740985	Female	69	Better	10		10	15817.6
740965	Male	24	Better	11		11	15428.7
738470	Male	60	Better	7	3	10	15424.3
659266	Female	34	Better	3		3	4023.97
742671	Male	54	Better	9		9	9245.78
741658	Female	81	Better	17		17	18653.5
741588	Male	37	Better	9		9	3826.01
741423	Male	70	Better	21		21	38353.3
741046	Male	58	Others	7		7	17881.5
740764	Female	75	Better	8		8	13544.1
740754	Male	34	Better	14		14	19810.3
740543	Male	73	Better	17		17	17214.5
740443	Female	75	Better	10		10	14291
645047	Male	90	Better	18		18	18203.1
538311	Female	56	Better	7		7	6448.67
742462	Male	58	Better	15		15	29138.7
324647	Male	56	Better		37	37	93520.9
742592	Female	64	Better		13	13	45771
740877	Male	67	Better	1	6	7	32576
740745	Male	93	Better	13		13	15058.1
740484	Female	61	Better	4		4	29953.1
542562	Male	75	Better	15		15	29847.1
742061	Male	64	Better		23	23	470367
742503	Male	82	Better	7		7	8101.64
741880	Male	56	Better	20		20	33612.7
741870	Male	65	Better	19	4	23	67203.7
741729	Male	68	Better	7		7	7993.61
741424	Female	40	Better	6		6	10798.1
741314	Male	83	Better	7	5	12	41325
741038	Female	45	Better	7		7	6586.66
740546	Male	66	Better	7		7	8456.18
740535	Male	68	Better	14		14	16174.6
741334	Male	70	Better	13		13	17134.7
681124	Male	49	Better	9		9	17079.2
695532	Male	50	Better	11		11	18308.4
742583	Male	78	Better		8	8	45427.4
741790	Male	61	Better	6		6	2697.77
740786	Male	54	Better	12		12	14580.7
740646	Male	75	治愈	6		6	9191.98
740476	Male	66	Better	12		12	19740.2
740417	Female	79	Better	4		4	9606.75
742664	Male	79	治愈	7		7	9372.78
743681	Male	84	Better	11		11	25660.4
711934	Female	56	Better	11	1	12	15048
742151	Male	74	治愈	13		13	30301.8
742515	Female	73	Others	5		5	13814
590981	Male	90	Better	12		12	19546.2
742576	Male	62	Better	1		1	3032.14
740769	Male	27	Better	0	2	2	10008.5
740759	Male	86	Better	1		1	5290.33
340355	Male	87	Better	10		10	16757.1
498625	Female	70	Better	8		8	9934.63
483513	Male	32	Better	10		10	10070.2
743002	Male	59	Better	12	2	14	26790.9
613445	Female	72	Better	9		9	11282.1
742427	Female	59	Better	11		11	12411
742252	Male	84	Better	8		8	15210.3
740559	Male	60	Better	4		4	7378.14
599098	Female	76	Better	11		11	19219.5
489037	Female	79	Better	4		4	5022.92
682797	Male	79	Untreated	24		24	48234.7
742913	Male	51	Better	6		6	8073.02
637360	Male	60	Better	7		7	5023.91
742152	Female	80	Better	5	7	12	56263.1
741369	Male	51	Better	14		14	22592.5
735884	Male	86	Better	13		13	24180.7
337127	Female	86	Better	17		17	18446.9
674909	Female	48	Better		5	5	53071.6
743774	Female	67	Better	7	2	9	23284.8
743644	Female	52	Untreated	6		6	15811.6
742994	Male	85	Better		41	41	278281
742693	Male	18	Better	2		2	3829.42
742579	Male	72	Better	6	6	12	30419.4
741400	Male	54	Better	10		10	18316.9
738763	Male	78	Better	7		7	34054.3
730438	Male	64	Better	12		12	14093.7
663171	Female	77	Better	8		8	10953.6
745841	Male	58	Better		33	33	349170
745771	Male	51	Death / Abandonment	5	5	10	63991.4
745852	Male	65	Others	5		5	16979.5
742340	Female	76	Better	3		3	6591.99
743171	Female	98	Better	5		5	3230.05
489103	Male	77	Better	21		21	59864.6
743951	Female	50	Better	12	6	18	30750.6
743931	Female	75	无效	14		14	22050.2
743221	Male	51	Better	11	3	14	29326.1
743056	Male	80	Better	0	17	17	94925.9
742945	Male	81	Death / Abandonment	1		1	3394.38
742630	Male	64	Better	7		7	11130.4
363541	Female	63	Better	31		31	41821.2
739557	Male	53	Better	7		7	8456.22
744051	Male	55	Better	3		3	7819.52
744021	Male	39	Better	3		3	4253.08
742816	Female	70	Others	14		14	10654.3
741974	Male	38	Better		26	26	208376
567259	Female	79	Death / Abandonment		2	2	43985.8
446382	Female	74	Better	12		12	14980.6
732331	Male	70	Better	12		12	15772.7
744022	Female	75	Better	11		11	13017.3
743872	Female	63	Better	17		17	41694.7
743173	Female	55	Better	9		9	7559.46
742798	Male	89	Better	7	2	9	21027.2
659255	Female	59	Better	23		23	57160.4
634055	Male	74	Better	14		14	18015.8
733720	Female	58	Untreated	11		11	21947
548057	Male	81	Better	25	7	32	68884.1
746055	Female	65	治愈	7		7	17826.3
746085	Male	86	Better	9		9	10126.7
745895	Male	62	Better	13	2	15	16448.7
743607	Female	65	治愈	10		10	12107
743254	Female	72	Better	9		9	8677.13
743184	Male	46	Better	14		14	10134.1
743029	Male	66	Better	13		13	15901.5
745915	Male	64	Better	0	5	5	41601
743637	Male	78	Others	17		17	20897.3
746096	Male	67	Better	15		15	27661.3
745977	Male	34	Better	6		6	10195.3
743444	Female	52	Better	9		9	13001.2
743165	Female	56	Better	9		9	13165.1
742809	Female	75	Death / Abandonment	0	11	11	112769
448436	Female	54	Better	7		7	7009.38
421344	Male	82	Better	6		6	7682.86
734220	Male	67	Better	6		6	8631.29
66687	Male	83	Better	2		2	3320.74
277339	Female	83	Better	19		19	31801.6
745908+	Female	51	Better	13		13	14855.2
743819	Male	59	Better	5		5	18270.9
743445	Male	88	Better	11		11	13748.9
743086	Male	60	Better	20		20	29391.1
742990	Female	75	Better	3		3	5279.24
742900	Male	55	Better	5		5	6061.07
742770	Male	62	Untreated	1		1	5916.27
641519	Female	90	Better	17		17	15495.5
746089	Female	64	Better	7		7	7716.65
478926	Female	73	Better	7		7	15392.3
745868	Male	82	Better	14		14	17632.8
745181	Male	44	Better	14		14	15368.6
743187	Male	81	Death / Abandonment	20		20	37479.7
633985	Male	79	Better	7		7	4738.59
517876	Male	86	Death / Abandonment	13	9	22	527067
403439	Female	82	Better	7		7	14882
662844	Female	57	Better	12		12	17213.7
745629	Male	89	治愈	7		7	11980.8
412866	Female	84	Better	8		8	6413.22
725862	Male	85	Better	11		11	14585.7
500546	Female	75	Better	12		12	7747.76
746751	Female	92	Others	0	1	1	543.58
745820	Female	69	Better	9	8	17	48230.3
745740	Female	82	Better	8		8	12426
745214	Male	76	Better	5		5	5850.93
743917	Male	55	Better	11		11	20252
743820	Female	63	Better	4		4	11260.9
743490	Male	82	Better	7	3	10	20084.7
745232	Male	65	Better	5		5	5732.79
732569	Male	87	Death / Abandonment	31		31	59081.4
489020	Male	60	Better	3		3	4202.85
746511	Female	76	Better	2	2	4	14309.5
745315	Male	77	Untreated	13		13	22390.4
746501	Male	59	Better	9		9	13900
745145	Male	77	Better	15		15	16095.8
744760	Male	82	Others	7		7	16633.8
744708	Male	80	Better	10		10	6347.39
743150	Female	62	Better	7		7	8571.06
742096	Female	60	Better	9	2	11	25558.4
603808	Female	75	Better	9		9	10347.2
590901	Male	71	Better	32		32	37379.6
745045	Male	51	Better	10		10	10769.2
746612	Male	78	Better		7	7	49096.2
744059	Female	68	Better	12		12	17404.9
743879	Male	55	Better	9		9	11471.8
743160	Male	62	Better	10	2	12	49327.7
747051	Male	65	Better	4	2	6	18803.5
745067	Male	66	Death / Abandonment		15	15	81387.2
745017	Female	85	Better	8		8	11378.7
737559	Female	20	Better	1		1	5066.56
734244	Male	63	Better	10		10	16242.9
746952	Male	65	Better	3	4	7	21195.4
664370	Female	68	Better	14		14	20631
747052	Male	69	Others	21		21	35482
747012	Male	80	Death / Abandonment		8	8	83684.7
746713	Male	73	Better	10		10	13104.1
745349	Female	52	Better	1		1	1708.67
745048	Male	83	Better	16	5	21	48397.7
744140	Female	57	Better	16	5	21	43491
747153	Male	58	Better	6		6	9582.54
745189	Male	84	Better	10		10	17521.6
744990	Male	47	Others	0	1	1	902.63
741987	Male	78	Better	8	3	11	18994.6
746735	Male	78	Better	9	5	14	47016.8
745140	Male	56	Better	11		11	19001
742218	Female	88	Better	19		19	22563.4
742208	Male	78	Better	11		11	14362
600587	Male	74	Better	10		10	20667.3
394103	Male	74	Better	8		8	5892.03
642753	Male	82	Better	13		13	19467.9
747471	Female	33	Better	12		12	11924.5
498625	Female	70	Untreated	28		28	29453.6
747602	Male	59	Better		16	16	77550.6
747382	Female	61	Better	6		6	12831.2
745340	Male	73	Better	16		16	16740
744997	Female	65	Better	10		10	10075.7
706010	Male	81	Better	14		14	20215.7
695532	Male	50	Better	7		7	10914.9
746798	Male	51	Better	18		18	22393
478918	Male	65	Better	5	3	8	21387.6
612398	Male	84	Death / Abandonment		33	33	259815
741161	Male	64	Better	7		7	6406.63
714132	Male	73	Better	33		33	53379.5
667044	Male	72	Better	9		9	14561.8
747914	Male	76	Better	8		8	28084.1
746809	Male	56	Untreated	8		8	14431.7
746538	Male	72	Better	4	4	8	33653.3
74355	Male	45	Better	5		5	6737.36
746860	Male	27	Better	6		6	4540.23
747835	Female	49	Better	26		26	58023.6
747576	Male	53	Death / Abandonment		2	2	10339.2
747426	Male	72	Better		37	37	200351
741938	Female	75	Better	17	1	18	22014.5
592079	Male	49	Better	11		11	12432.4
747217	Male	36	Better	10		10	5470.36
700297	Female	58	Better	6		6	6223.27
415282	Female	70	Better	13		13	18877.8
649924	Male	77	Better	13		13	28522.2
748651	Male	34	Others	7		7	12500.9
748442	Female	74	Better	13	2	15	33886.9
748232	Female	70	Better	7		7	13346.8
747208	Male	42	Better	11		11	24574.1
747098	Female	81	Better	3		3	6727.28
747069	Male	71	Better	7		7	11428.2
746969	Female	38	Better	7		7	4918.89
746546	Female	64	Better	23		23	26864.3
742039	Male	75	Better	7		7	40816.3
741369	Male	51	Better	7		7	6755.51
599587	Male	65	Better	10	7	17	50702.7
706830	Female	65	Better	1		1	2651.53
734244	Male	63	Better	9		9	10231.3
666750	Male	51	Better	30		30	9479.09
645047	Male	90	Better	18		18	25401.2
747219	Male	73	Better	3		3	3485.37
748762	Female	40	Others	6		6	9407.06
748623	Male	52	Better	7		7	8570.2
747090	Male	60	Better	15		15	19425.8
746950	Male	31	Better	0	14	14	38998.1
745862	Male	84	Better	18		18	105936
739557	Male	53	Better	6		6	9416.65
347004	Female	75	治愈	7	2	9	17767
576021	Male	71	Better	6		6	7361.59
516246	Female	81	Better		36	36	111363
748734	Female	52	Better	14		14	17516.4
748724	Male	60	Better	15		15	20667
748424	Female	32	Better	4	3	7	17014.4
747738	Male	73	Untreated	5		5	14912.2
747350	Male	45	Better	10		10	15284.6
620127	Male	58	Better	11	10	21	69650.9
324647	Male	56	Better		29	29	71125.8
505609	Male	46	Better	8		8	6033.94
749591	Female	64	Better	13		13	10157.7
748382	Male	79	Better		2	2	21091
747648	Male	18	Others	14		14	7513.53
744789	Male	49	Better	18		18	31473.2
734220	Male	67	Better	6		6	12583.9
500363	Male	76	Better	3		3	4163.76
749891	Male	71	Better	12		12	16256.6
749841	Male	62	Better	10		10	7088.99
748686	Male	81	Better	4		4	7833.3
748212	Male	77	Better		23	23	146958
692429	Female	82	Better		17	17	113795
664910	Female	68	Better	14		14	18583.1
749491	Male	58	Better	2		2	5678.5
749702	Male	62	Better	11		11	7466.41
749642	Male	82	Better		16	16	75701.8
749451	Female	57	Better	10		10	8251.41
748506	Female	59	Better	11		11	14970.8
280365	Male	86	Better	15		15	18337.5
725204	Female	74	Better	11		11	12048.8
749351	Female	65	Better	6	2	8	17386.2
749566	Male	70	Others	12		12	28233
748303	Male	70	Better	3	10	13	87637
749572	Female	57	Better	8		8	6815.31
779784	Male	75	Better	10		10	23294.3
749443	Male	60	Death / Abandonment	26	8	34	108284
749222	Male	59	Better	15		15	20643.6
748558	Male	30	Better	4		4	5003.33
748456	Male	36	Better	14		14	32380.4
748345	Male	55	Untreated	7		7	12461.1
748194	Male	61	Better	11		11	12547.1
748014	Male	70	Better	10		10	12631.8
747867	Female	59	Better	5		5	2371.22
744730	Female	49	Better	8		8	5538.72
607408	Male	63	Better	11		11	11581.5
749854	Male	62	Better	9		9	14705.4
749503	Female	79	Better	21		21	27906
749062	Female	52	治愈	8		8	8100.61
748832	Male	35	Better	7	2	9	14806.6
748408	Female	63	Better	7		7	13748.8
748356	Male	81	Better		10	10	30889.3
626420	Male	48	Better	7		7	9848.79
749884	Male	61	Better	2		2	3582.03
640125	Male	78	Better	16		16	23065.1
749835	Female	83	Death / Abandonment		7	7	51088.3
748336	Male	66	Others	1		1	3152.54
748316	Male	72	Better	10		10	14442
746096	Male	67	Better	10		10	11384.4
368467	Male	77	Better	9		9	9264.72
734297	Female	49	Untreated	2		2	4471.73
553214	Male	73	Better	7		7	21261.6
637924	Female	66	Better	8		8	9380.31
748337	Male	59	Others	14		14	21608.2
748187	Male	71	Better	4		4	6309.31
724253	Male	84	Better	13		13	25046.9
278340	Female	56	Better	7		7	6597.03
749681	Male	83	Better	5		5	7695.71
749637	Female	44	Better	4		4	5330.94
749547	Female	61	Better	14		14	20311.2
749226	Male	68	Better	14		14	18154.1
641909	Female	68	Better	11	1	12	22097.8
517080	Male	78	Better	13		13	35389.5
750002	Male	87	Better	10	2	12	35443
749257	Female	63	Better	9		9	18493.8
735597	Male	51	Better	29		29	35012.5
748845	Female	72	Better	5	2	7	18578
750203	Male	70	Others	7		7	9914.76
749836	Male	74	Untreated	7		7	16435.5
749679	Female	79	Better	14	4	18	53502.4
749136	Male	72	Better	11		11	12345.9
749026	Female	16	Better	7		7	4529.12
748835	Female	63	Better	11		11	11657.8
750243	Male	68	Better	1		1	5557.52
746403	Male	36	Better	2		2	1881.48
695532	Male	50	Better	5		5	9607.72
657302	Female	57	Others	12		12	10001.1
686977	Male	68	Better	21		21	46629.5
751001	Male	66	Better	8		8	13150.5
754639	Male	54	Untreated	12		12	13496.1
750961	Female	63	Better	7		7	13459.4
749138	Male	71	Others	19		19	35501.9
748886	Female	52	Better	7		7	7232.69
738847	Male	63	Better	10		10	11920
526143	Male	72	Better	13		13	14972.6
751331	Female	19	Better	3		3	4093.69
751051	Male	66	Better	12		12	17151.4
749944	Female	52	Better	1	2	3	58975.4
751141	Male	38	Better	6		6	5100.17
745349	Female	52	Better	7		7	27129
751052	Male	62	Better	6		6	10984
750683	Male	69	Better	8	7	15	47674
750342	Male	64	Untreated	7		7	11075.8
750256	Female	79	Better	11		11	26722.7
675709	Male	58	Better	11		11	11518.5
326402	Female	80	Better	19		19	41872.9
750492	Male	55	Untreated	1		1	16932.7
752419	Male	55	Untreated	4		4	7553.62
489103	Male	77	治愈	20		20	49716
751073	Male	82	Death / Abandonment		8	8	36535.7
616110	Male	77	Better	7		7	8766.02
641519	Female	90	Better	17		17	23417.7
430518	Male	83	Better	25		25	32361.9
750763	Male	42	Better	10		10	15079.7
751422	Female	61	Better	7		7	12384.2
751253	Male	47	Untreated	7		7	2843.71
750924	Male	76	Better	38		38	51522.9
750714	Male	71	Better	8	2	10	20675.5
746174	Male	44	Better	9		9	12772.5
751203	Male	78	Better	9		9	13007
654569	Male	49	Death / Abandonment	10	14	24	383912
750795	Female	56	Better	8		8	10840.6
750697	Male	25	治愈	12		12	6390.3
750513	Male	52	Better	9		9	17132.9
750227	Male	81	Better	4		4	6901.38
750137	Male	70	Better	9		9	9359.5
750097	Male	68	Better		29	29	224927
731524	Male	58	Better	22		22	15390.8
750117	Male	66	Better	16		16	32551
751065	Female	68	Better	4	3	7	18170.8
750614	Male	65	Better	9		9	13979.2
750047	Male	82	Untreated	3		3	4292.53
489037	Female	79	治愈	18		18	28515.8
748890	Male	70	Better	10		10	20942.1
365157	Female	71	Better	9	2	11	20248.7
739567	Male	74	Better	7		7	8223.02
430016	Male	80	Better	8		8	22359
234253	Male	78	Better	14		14	17911.8
662844	Female	57	Better	13		13	18980.8
752351	Female	53	Better	2		2	4365.63
751416	Male	49	Better	10		10	9876.84
750269	Male	75	Better	14		14	22821
540738	Male	65	Better	10		10	13350.4
624328	Male	79	Better		31	31	98081.9
478899	Male	85	Better	4	3	7	21065.7
366287	Male	71	Better	8		8	11757.2
489420	Male	75	治愈	13	2	15	24104.4
596252	Male	72	治愈		27	27	114826
728049	Male	89	治愈	6		6	8052.72
752231	Female	55	Untreated	2		2	6760.38
752113	Male	54	Better	12		12	23467.3
752561	Female	76	Better	11	2	13	26603
751256	Male	77	Better	5		5	10774.1
751206	Male	51	Better	21		21	24942.3
750229	Male	66	Better	14	6	20	65680.5
750009	Male	80	Better	15	13	28	213448
749989	Female	71	Better	7	2	9	21382.3
748898	Male	67	Better	15		15	26552.6
685134	Male	62	Better	16		16	22882.2
752282	Male	79	Better	7		7	9019.06
752184	Male	33	Better	13		13	8121.76
752094	Male	65	Better	7		7	21503
751247	Female	60	Better	7	1	8	12739
750327	Male	79	Better	7		7	9642.76
749990	Male	87	Better		9	9	36466.2
746316	Male	67	Better	4	2	6	15124.6
746155	Female	73	Better		9	9	45408.9
727225	Female	26	Better	3		3	4366.36
751792	Male	51	Better	8	4	12	34816
750478	Male	78	Untreated	8		8	18191.7
732456	Male	81	Better	20	4	24	70534.2
376076	Female	84	Better	18		18	15083.1
751814	Male	81	Better	8		8	8613.65
666423	Male	50	Better	13		13	16325.8
752136	Female	89	Better	5		5	7416.11
751178	Male	69	Better	11		11	12362.2
750578	Male	50	Better	11		11	17919.4
746216	Male	33	Better	2		2	2063.74
752066	Male	36	Better	10		10	12228.5
750449	Male	55	Untreated	5		5	16943.7
746798	Male	51	Better	5		5	8648.42
415268	Male	93	Death / Abandonment		26	26	135839
283766	Male	45	Better	11		11	6386
504466	Female	75	Better	11		11	17532.9
752313	Male	65	Better	4		4	6001.7
752294	Male	74	Better	10		10	12519.2
751279	Female	32	Better	2		2	3709.65
751269	Male	54	Better	2		2	12417.4
751140	Male	79	Better	11		11	23457.6
423720	Male	76	Better		36	36	185613
335529	Male	84	Better	11	3	14	33859
751715	Male	65	Better	0	1	1	18774.1
751400	Female	74	Better	13		13	13163.4
751350	Male	87	Better	24		24	51307.5
743307	Male	61	Death / Abandonment		4	4	26078.4
751745	Male	90	Better	7		7	11645.3
690686	Female	61	Better	13		13	13313.6
404366	Male	68	Better	19		19	22202.3
751605	Male	79	Better	10		10	13864.6
363541	Female	63	Better	19		19	38101.2
734220	Male	67	Better	6		6	8889.45
666750	Male	51	Better	33		33	12172.9
753492	Male	81	Better	6		6	11584.5
753442	Female	57	Better	18		18	27992.5
420224	Male	57	Better	12		12	11900.7
751616	Male	47	Better	17	4	21	29230.4
751606	Female	83	Better	10		10	11609
746267	Male	19	Better	4		4	2885.94
590126	Male	60	Better	12		12	14574.6
752663	Female	61	Others	10		10	14942.7
751910	Female	61	Better	21	4	25	33581.9
324647	Male	56	Better		28	28	56667.5
751557	Male	83	Better	19	7	26	68208.4
751537	Female	59	Better	8		8	14577
359906	Female	81	Better	18	6	24	71289.4
456364	Male	75	Better	10		10	13485.6
739557	Male	53	Better	5		5	6144.36
730038	Male	51	Better	11		11	14512.4
753091	Male	84	Better		3	3	15012.6
753016	Male	50	Better	8		8	9913.58
752991	Male	71	Better	15	2	17	30396.7
722266	Male	84	Better	3		3	13775.8
753111	Male	67	Better	5		5	8296.99
645814	Female	69	Better	16		16	22233.3
700064	Male	67	Better	9		9	12233.2
680449	Female	79	Better	6		6	6328.6
753623	Female	81	Better	12		12	13216.7
645047	Male	90	Better	21		21	26702.5
753732	Male	84	Death / Abandonment	15	33	48	226914
752378	Male	65	Better	14		14	15602
724253	Male	84	Better	9		9	31655.1
741161	Male	64	Better	6		6	7229.63
718505	Female	77	Better	10	2	12	27820.8
714132	Male	73	Better	18		18	23035.3
695532	Male	50	Better	6		6	9316.77
752874	Female	77	Death / Abandonment	2		2	3820.77
752815	Female	36	Better	2		2	7862.73
752936	Female	86	Better	22		22	46726.5
752866	Male	64	Better	14		14	12263.7
752449	Male	78	Better	14		14	21741.3
752419	Male	55	Better	6		6	5547.12
752389	Female	55	Better	8		8	7153.82
722266	Male	84	Others	3		3	54225.6
746179	Male	66	Better	9		9	22938.3
746096	Male	67	Better	4		4	6974.66
753284	Male	77	Better	30	11	41	148003
753194	Male	76	Better	6		6	10390
752974	Male	72	Death / Abandonment	23		23	56146.2
752897	Male	87	Better		5	5	31322.3
751719	Male	76	Better	16	3	19	67738.7
474269	Male	75	Better	9		9	16222.9
752984	Male	50	Untreated	9		9	16748.6
393143	Male	79	Better	6	3	9	25834.1
752988	Male	83	Untreated	15		15	19206.2
752966	Male	78	Better	14		14	21075
752928	Female	57	Untreated	2		2	4853.26
751640	Female	26	Better	13		13	13862.5
746279	Male	69	Better	21	6	27	50130.4
612355	Male	68	Better	16	4	20	44531.1
734334	Female	72	Better	29		29	30555.1
753628	Male	85	Better	11		11	21292.8
753548	Female	84	Better	3		3	6694.26
752609	Male	67	Untreated	11		11	24314.9
751570	Male	67	Better	17		17	18639.1
722266	Male	84	Death / Abandonment		1	1	19524.3
753247	Female	66	Better	9		9	20150.2
603808	Female	75	Better	13		13	17471.3
651737	Male	56	Better	13		13	17822.8
753923	Male	80	Better	11		11	18700.8
752690	Male	71	Better	31		31	43949.8
754812	Male	65	Better	11		11	6732.32
754307	Male	57	Better	13		13	18484.3
753844	Male	43	治愈	7		7	5823.65
753550	Male	56	Better	7		7	19967
753329	Female	87	Better	15		15	18319.3
752699	Female	64	Better	12		12	14660.7
446597	Male	47	Better	10		10	7397.73
706354	Male	72	Untreated	11		11	14672
567122	Male	46	Better	3		3	2483.38
552605	Male	86	Better		5	5	17907.2
754982	Male	56	Better	4		4	9015.62
753915	Male	53	Better	10		10	7194.9
753119	Female	54	Better	2		2	4415.25
753079	Male	62	Untreated	7		7	14256.8
753009	Male	69	治愈	10		10	17051.8
724032	Female	75	Better	15		15	16744.7
489020	Male	60	Better	4		4	4998.26
632433	Female	88	Death / Abandonment	13	18	31	233395
588034	Male	85	Better	7		7	10792.5
724253	Male	84	Better	19	0	19	32817.1
746174	Male	44	Better	5		5	5903.85
754273	Male	59	Better	10	6	16	45164
754453	Male	85	Better	15		15	16335
670381	Female	49	Better	6	2	8	20090.9
754634	Male	74	Better		8	8	44741.3
754435	Male	61	Better	5		5	9010.26
754395	Male	75	Better	4		4	9310.32
753857	Male	50	Better	0	2	2	15687.4
633265	Male	54	Better	2		2	6098.54
620821	Male	55	Better	13		13	20259
755431	Male	60	Better	6		6	6423.03
695160	Male	54	Better	5		5	6457.49
755104	Male	50	Better	8		8	5353.79
755812	Male	87	Better	20	14	34	96682
433100	Male	58	Better	11	3	14	27163.5
755165	Male	58	Death / Abandonment		1	1	8961.59
518265	Male	76	Better	0	6	6	25767.9
755932	Male	75	Better	6	11	17	51106.4
755533	Male	72	Better	32		32	57689.2
751016	Male	77	Better	8	6	14	52440
423151	Female	74	Better	16		16	12868.8
731524	Male	58	Better	13		13	9454
405751	Female	61	Better	26		26	24061.7
755443	Male	80	Better	12		12	13894.5
757087	Female	84	Better	8	3	11	26361.1
755575	Male	89	Better	11		11	14141.1
755474	Female	59	Better	16		16	27189.9
755334	Female	86	Better	2	1	3	14596.8
755167	Male	75	Better		8	8	64172.9
754239	Male	57	Better	14		14	12853.1
754180	Male	73	Better	3		3	9163.6
754139	Female	71	治愈	22		22	39470.1
752113	Male	54	Better	7		7	10151.8
489037	Female	79	Better	19		19	18990.6
746798	Male	51	Better	4		4	10125.1
695453	Male	89	Better	14		14	24814.5
326402	Female	80	Better	30		30	82930.6
754878	Female	46	Better	7		7	8390.5
756471	Male	52	Better	2		2	4471.76
429920	Female	85	Better	7		7	13550.7
562658	Male	47	Better	2		2	3000.79
756551	Male	78	Better	18		18	37358.5
755646	Male	58	Better	8		8	12463.9
725106	Male	66	Better	9	2	11	35934.1
755286	Male	52	Better	8		8	11131.7
754545	Male	48	Untreated	6		6	13104.7
644912	Male	66	Better	2		2	6196.35
286674	Female	45	Better	1		1	663.34
486351	Male	83	Better	4	2	6	20345
756742	Male	91	Better	12		12	9224.43
756683	Male	25	Better	11		11	12952.7
501225	Male	97	Death / Abandonment	6		6	20776.9
755966	Male	55	Better	36		36	49200.6
755836	Male	54	Better	5		5	7439.56
755060	Male	30	Better	8		8	12505.2
754939	Male	38	Better	16	3	19	28175.2
754576	Male	80	Better	8		8	12896.6
754526	Female	53	Untreated	5		5	5736.67
608469	Female	74	Better	0	1	1	7455.46
739567	Male	74	Better	7		7	9702.51
673505	Female	59	Better	40		40	60393.4
756643	Male	51	Better	5		5	4148.03
755948	Male	46	Better	9	24	33	292311
647915	Female	80	Better	13	0	13	222748
738847	Male	63	Better	12		12	18702.8
725155	Male	86	Others	2	10	12	72501.6
756524	Male	46	Better	10		10	11470.4
755649	Male	29	Better	0	22	22	158090
755639	Male	83	Better	15		15	20712.8
755478	Female	67	Better	10		10	22546.9
605193	Male	60	Better	9		9	12203.7
337120	Female	83	Better	5	2	7	24529.9
695532	Male	50	Better	6		6	9560.42
756874	Male	79	Better	7		7	11145.9
756746	Male	77	Better	4		4	5493.27
756686	Female	58	Better	9		9	9408.72
756576	Male	55	Untreated	0	1	1	6552.75
755880	Male	51	治愈	7	4	11	25822
755269	Male	73	Better	11		11	13657.6
641519	Female	90	Better	23		23	111442
739557	Male	53	Better	7		7	10160.7
669128	Male	75	治愈	1	3	4	19427.9
286674	Female	45	Better	21		21	4949.17
756706	Male	68	Better	7		7	18377.3
756537	Female	60	Better	12		12	13778.9
753939	Male	82	Better	13		13	19410.9
753929	Female	60	Better		8	8	40624.2
753889	Male	35	Better	5	3	8	35107.3
195010	Male	81	Better	11		11	14614.8
746096	Male	67	Better	4		4	7190.86
566832	Male	60	Better	12		12	14040.5
756181	Male	79	Better	0	1	1	7041.4
754660	Male	47	Better	12		12	8213.08
753849	Male	77	Better	7		7	8604.69
756191	Male	53	Untreated	5		5	3513.21
756776	Male	26	Better	6		6	6763.81
756649	Male	88	Better	1		1	4228.42
754080	Male	51	Better	7		7	15348.6
463070	Female	61	Better	33		33	30404.1
554075	Male	83	Better	11	5	16	64043.2
758631	Male	71	Better	14		14	43415.2
757882	Male	51	Better	4		4	8143.17
329104	Male	88	Better	12		12	10806.9
757108	Male	74	Others	6		6	13710
757087	Female	84	Better	7		7	6653.2
756092	Male	79	Better	5		5	7478.53
756570	Male	68	Better	16		16	11644.6
756530	Male	20	Better	2		2	3306.34
395335	Male	61	Better	9		9	25848.6
754040	Female	80	Better	8	3	11	19531.5
753840	Male	28	Better	5		5	7007.37
324647	Male	56	治愈		69	69	164689
592008	Female	75	Better	0	7	7	37835.3
758491	Female	72	Better	16	3	19	41426
758481	Male	81	Better	5		5	8116.23
757048	Male	58	Better	16		16	12928.5
756203	Male	75	Better		3	3	74184.3
754010	Male	77	Better	7		7	14821.8
465928	Female	78	Better	13		13	20772.8
348803	Male	90	Better	15		15	20812.4
758322	Male	60	Better	4	14	18	75784.4
758112	Female	82	Better	4		4	7067.09
757991	Male	50	Better	4		4	9341.82
757823	Male	55	Better	6		6	5276.04
756959	Male	50	Better	18		18	37549.7
756123	Female	76	Better	8		8	11665.6
756004	Male	77	Better	25		25	45154.5
753920	Male	89	Better	20	15	35	154349
757971	Female	55	Untreated	15		15	38451.1
724253	Male	84	Better	11		11	28858
723958	Male	44	Better	2		2	2838.86
620127	Male	58	Better	9	9	18	60396.8
441222	Female	68	Better	0	5	5	24399.8
582191	Female	69	Better	29		29	31702.9
570661	Male	71	Better	17		17	34052.4
734244	Male	63	Better	6		6	8504.84
666750	Male	51	Better	43		43	13322.5
758151	Male	53	Better	4		4	6769.5
757733	Male	72	Better	2		2	6283.46
758222	Female	60	Better	3		3	9711.94
757784	Male	81	Better	14		14	30483.7
757690	Male	86	Better	14		14	13675.2
757594	Female	68	Better	12		12	19758.3
753404	Male	84	Better	1	0	1	21232.9
698755	Male	62	Better	20		20	34213.9
532281	Male	54	Better	9	1	10	22108.6
757744	Female	64	Better	13		13	17513.8
757755	Male	60	Better	10		10	7272.41
757705	Male	68	Better	9		9	6649.62
757080	Male	57	Better	16		16	13526.4
756346	Female	74	Better	13		13	11243.6
756286	Male	31	Better	15	7	22	51949.3
728431	Male	59	Better	16		16	17835
639402	Male	61	Better	7	5	12	37760.3
603808	Female	75	Better	12		12	16909.5
596359	Male	67	Better		4	4	20031.5
314362	Male	82	Better	3	3	6	186303
758575	Male	47	Better	12		12	11855.5
757546	Male	70	Better	12		12	17173.8
757826	Male	44	Better	4		4	5978.78
756026	Male	84	Better	12		12	21251.8
632382	Male	66	Better	10		10	14484.8
757876	Female	81	Better	8	6	14	52441
757659	Male	51	Better	36		36	70393.3
756239	Male	75	Better	12		12	12738.8
223273	Male	85	Better	13		13	13842.4
521072	Female	59	Better	3		3	3594.59
758224	Female	69	Better		5	5	11006.2
757778	Female	49	Better	2		2	3216.8
757144	Male	61	Better	10		10	11542.8
749891	Male	71	Better	9		9	14077.3
344413	Male	33	Better	19		19	13060
758369	Female	47	Better	8		8	7551.61
757975	Male	53	Better	4		4	5161.88
757899	Male	78	Better	11	4	15	40020.2
757799	Male	70	Better	10		10	9711.22
756118	Male	87	Better		4	4	19630.6
756118	Male	87	Better		1	1	7374.94
376076	Female	84	Better	28		28	28754.3
746798	Male	51	Better	4		4	8647.89
665327	Male	79	Better	11		11	15870.2
612355	Male	68	Better	11	6	17	51696.3
607669	Female	76	Better	10		10	11952.9
741161	Male	64	Better	7		7	8537.22
758207	Male	46	Better	8		8	6215.25
756110	Male	84	Better	2		2	3542.4
756009	Female	58	Better	12		12	20593.2
738763	Male	78	Death / Abandonment	1	4	5	48806.2
760551	Female	74	Better	17		17	23399.3
760501	Male	23	Better	6		6	6404.18
757422	Female	28	Better	13		13	10611.1
386216	Male	80	Better	19		19	17915.8
747364	Female	70	Better	15		15	23144.5
672305	Male	50	Better	7	1	8	11965.1
761672	Female	61	Better	11		11	11443.9
761531	Male	33	Better	6		6	3663.19
761511	Male	58	Untreated	2		2	2485.48
761461	Male	69	Better	1		1	4446.41
760081	Male	61	Better	6		6	6459.79
760121	Male	59	Better	6		6	9809.96
761502	Male	74	Better	4	4	8	23594.1
760093	Male	72	Better	14		14	15101.7
758228	Male	68	Better	9	3	12	36397.4
756118	Male	87	Better		4	4	33545.8
724253	Male	84	Better	13		13	30469.4
759873	Male	68	Better	18	1	19	28963
760044	Male	61	Better	4	6	10	172667
759864	Female	78	Better		1	1	6401.27
759855	Female	85	Better	8		8	10393
756278	Male	60	Better	17	7	24	93134.7
718314	Male	67	Better	15	9	24	90742.9
679256	Male	85	Better	10		10	14914.5
759886	Male	80	Better	15		15	15423.2
753509	Female	80	Better	9		9	12398
444855	Male	54	Better	11		11	11514.7
761664	Male	79	Better	6	3	9	28652.1
695532	Male	50	Better	6		6	9829.08
761635	Male	52	Better	6	4	10	27365.2
681030	Male	64	Better	1		1	5632.21
761393	Female	42	Better	15		15	16357.7
760581	Female	72	Better	1	39	40	273375
760146	Male	52	Better	6		6	6647.31
759917	Male	68	Better	8		8	27902.2
759877	Female	66	Better	15		15	15650.8
759817	Female	50	Better	8		8	11314.3
757213	Male	72	Better	1		1	10237.5
756118	Male	87	Better		3	3	32727.7
639181	Female	52	Better	10		10	17369.6
634055	Male	74	Better	16		16	21211
746096	Male	67	Better	4		4	6776.33
442990	Male	40	Better	20		20	29247.4
566832	Male	60	Better	12		12	10994.8
686206	Female	84	Better	13		13	25742.4
421167	Male	73	Death / Abandonment		8	8	70854.9
420664	Female	72	Better	6		6	6350.47
761543	Male	82	Better	8	6	14	67645.3
760591	Male	83	Better	7	7	14	72644.6
760872	Male	74	Better	8		8	15038.2
760722	Female	42	Better	7		7	5488.08
760711	Male	48	Better	14		14	17683.7
516062	Male	65	Better	7		7	5382.75
645047	Male	90	Better	26		26	53494.8
321406	Male	83	治愈	7		7	7136.51
740101	Male	72	Better	23		23	24090.4
739557	Male	53	Better	2		2	3126.53
713932	Female	80	Better	10		10	10365
710754	Female	67	Better	8	6	14	40560.2
760316	Male	56	Untreated	5		5	16826.5
760048	Male	89	Better	17		17	52756.7
724754	Male	86	Better	8		8	10793.4
472143	Female	71	Better	11		11	28902.9
434383	Female	83	Better	10	4	14	40754.7
761668	Male	48	Better		17	17	227253
761587	Female	52	Better	11		11	17629.4
761524	Female	65	Better	9		9	14389
756643	Male	51	Better	10		10	13673.5
758000	Male	51	Better	5		5	8997.61
761091	Male	61	Better	3		3	5057.74
761021	Male	53	Untreated	1		1	621.63
760079	Male	73	Better	7		7	14532.9
757303	Female	75	Death / Abandonment		15	15	238164
756118	Male	87	Better		3	3	35297
601777	Female	65	Better	16		16	9987.86
303722	Male	33	Better	21		21	6213.92
761689	Male	51	Better	21		21	13756.3
760187	Male	41	Better	11		11	10635.4
759950	Male	49	Better	2		2	3732.01
744022	Female	75	Better	11		11	14537
595947	Female	64	Better		12	12	62243.5
761619	Male	62	Better	9		9	12751.9
761609	Male	78	Better	0	2	2	18436.8
761509	Male	21	Better	6		6	3567.39
474793	Male	47	Better	18		18	13773.4
760844	Female	55	Better	19		19	17221.3
760288	Male	74	Better	14	9	23	79025.3
756118	Male	87	Better		1	1	3596.26
383679	Female	39	治愈	37		37	15620.3
317874	Female	77	Better	24		24	25308
762721	Female	65	Better	6	7	13	53536
762192	Male	52	Better	8		8	11933.6
761243	Male	60	Better	3		3	4163.38
761670	Male	19	治愈	11		11	6464.81
761610	Male	74	Better	7		7	8718.89
761410	Female	25	Better	9		9	7056.12
760520	Male	74	Better	4		4	3856.73
760490	Male	76	Better	22		22	45014
664910	Female	68	Better	15		15	18438.2
734244	Male	63	Better	7		7	10040.1
762712	Female	80	Better	7	5	12	38255.1
761194	Female	59	Better	17	4	21	29448.9
760330	Male	57	Better	19		19	38274.4
619413	Female	85	Better	8		8	16632.2
737536	Female	77	Better	5		5	12760.6
537481	Female	72	Better	10		10	13784.1
762823	Female	54	Untreated	7		7	18446.7
762383	Male	59	Better	12		12	11133.6
762753	Female	44	Better	5		5	15230.3
762353	Female	63	Better	6		6	7914.44
761175	Male	31	Better	16		16	7298.95
761086	Female	83	Better		1	1	12226.5
757344	Female	70	Better	12		12	6868.9
757324	Male	79	Better	26		26	72123.8
757264	Female	82	Better	6		6	7599.71
724253	Male	84	Death / Abandonment	2		2	5184.38
747052	Male	69	Death / Abandonment	1		1	5608.17
746174	Male	44	Better	4		4	6006.88
741161	Male	64	Better	10		10	14660.5
762225	Male	57	Better	10		10	14251.2
761851	Female	75	Better	9		9	7992.67
761771	Male	65	Better	3		3	6422.38
761107	Male	55	Better	9		9	15098.9
433100	Male	58	Better	9		9	12885.9
534302	Male	59	Better	8		8	9409.78
762805	Male	83	Better	14	4	18	53772.1
761317	Female	83	Better		34	34	151647
762376	Male	84	Better	13		13	24581.8
761128	Female	64	Better	3	8	11	23692.6
326402	Female	80	Death / Abandonment	19		19	43691.9
420224	Male	57	Better	13	2	15	32300
407717	Female	54	Better	4		4	9754.73
506180	Female	55	Better	6		6	12496.8
657451	Male	56	Better	10		10	11811.2
753404	Male	84	Better	1		1	6646.17
746798	Male	51	Better	4		4	9414.89
762636	Female	62	Better	20	10	30	146385
675444	Male	77	Better	12		12	21963.9
762022	Male	64	Better	12		12	20170.7
761933	Female	58	Better	10		10	19585.1
473887	Female	83	Better	12		12	14543.2
575146	Female	79	Better	6		6	8801.42
685134	Male	62	Better	14		14	18249.7
762827	Male	83	Better	12	2	14	29944.3
762547	Male	79	Better	30	4	34	109809
762288	Male	77	Better	0	1	1	10812.6
762178	Male	70	Better	10	26	36	143596
761913	Male	23	Better	11		11	10409.2
761260	Male	62	Better	10		10	13017.8
757496	Female	64	Better	11		11	33906.9
757375	Male	51	Better	10		10	43413.9
336489	Male	82	Death / Abandonment	6	14	20	160357
762828	Female	74	Better	19		19	31662.8
762109	Female	50	Better	11	5	16	45830.4
744994	Male	65	Better	3	39	42	267402
350546	Male	66	Better	10		10	12642.2
762209	Male	86	Better	7		7	5962.16
190502	Male	86	Better	13		13	19520
523716	Female	77	Better	9		9	16293.2
429920	Female	85	Better	17		17	20248.1
762440	Male	68	Better	10		10	17233.1
762410	Male	54	Better	9		9	8344.41
761944	Male	52	Better	4	4	8	24568
761824	Female	61	Better	9	4	13	39676.9
761794	Male	72	Better	12	5	17	49243
398643	Female	82	Better	15		15	23212.2
756959	Male	50	Better	4		4	18127.8
706010	Male	81	Better	16		16	21771
762679	Female	81	Better		17	17	130274
762508	Male	77	Better	26		26	28870.3
761705	Male	55	Better	9	49	58	488087
757276	Male	86	Better	7		7	10150.8
636167	Male	52	Better	13		13	10624.9
763517	Female	27	Better	10		10	10003.2
763071	Male	77	Better	8		8	19301.9
382340	Male	83	Better	13		13	21673.5
434534	Female	76	Better		13	13	36822.2
763132	Male	83	Better	13		13	17431.8
761895	Female	88	Better	17		17	15390.1
761805	Male	81	Better	15		15	22353
761795	Male	86	Better	23		23	35306.9
515968	Female	55	Better	12		12	15545.9
757186	Male	56	Better	5		5	15294.2
732246	Female	78	Better	9	4	13	25499.6
706749	Female	47	Better	8		8	10159.6
764141	Female	70	Better	10	3	13	34555.4
762863	Female	75	Better		5	5	11798.2
762760	Male	84	Better	18	2	20	34075.2
761726	Male	79	Death / Abandonment	5		5	41224.8
760937	Female	63	Better	14		14	16463
746096	Male	67	Better	7		7	10796.6
739557	Male	53	Better	4		4	5330.38
716726	Female	58	Better	9		9	8056.85
708147	Male	67	Better	10		10	17249.1
764232	Male	42	Better	16		16	31977.8
763331	Male	59	Better	6		6	10356
525463	Male	68	Better	17		17	10495.8
763302	Male	63	Better	0	1	1	4581.46
763301	Male	52	Better	15	3	18	34585.5
761977	Male	59	Better	12		12	13220.6
405011	Male	78	Better	11		11	13049.6
734244	Male	63	Better	10		10	12775.9
763115	Male	53	Others	5		5	8354.85
407717	Female	54	Others	10		10	13881.6
764055	Male	62	Better	7		7	15744.7
763513	Male	32	Better	3		3	4013.71
763185	Male	59	Better	4	6	10	46261.3
521072	Female	59	Better	10		10	13933.9
758396	Female	59	Better	14	3	17	37234.1
749171	Female	51	Better	10		10	16254.5
378761	Male	69	Better	16		16	26497.8
274146	Female	42	Better	9		9	6841.04
731099	Male	58	Better	11		11	10784.5
764295	Male	43	Better	2		2	2684.68
763384	Female	65	Death / Abandonment		7	7	78333.2
762996	Male	80	Better	13		13	13481.6
761830	Male	77	Better	16	2	18	26160
761770	Female	63	Better	16		16	19894.6
710898	Male	59	Better	12		12	12576
764016	Male	55	Better	5		5	13865.5
763077	Male	85	Better	13	2	15	36290.4
763067	Female	77	Better	13		13	8660.81
763007	Male	64	Better	5		5	6712.48
757247	Male	91	Better		32	32	191434
641519	Female	90	Better	15		15	17035.4
749891	Male	71	Better	11		11	8652.64
734955	Female	65	Better	9		9	6939.66
695532	Male	50	Better	14		14	17725.2
764471	Male	73	Others	1		1	5181.03
763692	Female	75	Better	13		13	14489.4
763426	Female	79	Better	15		15	18652.5
762878	Male	55	Better	2		2	9411.31
702844	Female	70	Better	13		13	26739.3
666750	Male	51	Better	37		37	12645.4
757826	Male	44	Better	5		5	4533.88
443440	Male	78	Untreated	15		15	22089.2
765441	Male	74	Better	14		14	18456.8
764482	Male	58	Better	10		10	19409.7
763599	Male	63	Better	2		2	7771.52
763598	Male	53	Better	7	5	12	53965.5
763434	Male	70	Better	27	4	31	71582.7
763418	Male	65	Better	2		2	3380.34
763318	Female	59	Better	9		9	10168.8
763278	Male	74	Better	6		6	8376.05
763140	Female	79	Better	5		5	4770.14
757358	Male	56	Better	10	4	14	31183.5
489020	Male	60	Better	14		14	13608.6
617565	Female	65	Better	8	2	10	11249.5
600629	Male	60	Better		6	6	92998.3
437284	Female	69	治愈	9		9	8702.67
764475	Female	64	Better	8		8	13328.6
764762	Female	71	Better	21		21	24845.7
369253	Male	68	Better	7		7	11296.1
732256	Male	81	Better	14		14	18090.4
764782	Male	75	Death / Abandonment	14		14	35286.5
763804	Male	72	治愈	10		10	7329.46
763674	Male	53	Better	10		10	9327.32
763570	Male	59	Better	14	21	35	132029
765253	Female	76	Better	12		12	7984.41
763935	Male	51	Better	1		1	2538.39
746798	Male	51	Better	4		4	7183.72
765495	Female	55	Better	8		8	9790.93
765731	Female	68	Better	2		2	10233.8
765572	Female	72	Others	4		4	8002.67
764983	Male	59	Better	5		5	7373.74
764554	Male	65	Better	9		9	9375.59
521780	Male	75	Better	10		10	11573.6
666973	Male	53	Better	2		2	36612.3
757519	Male	89	Better	27		27	35351
757188	Female	44	Better	2		2	3081.55
496068	Male	66	Better		2	2	10099.2
549530	Female	84	Better	8		8	8056.88
732859	Male	64	Better	17		17	14453.7
765743	Male	70	Untreated	2		2	10178.4
765386	Male	69	Better	14		14	17486.2
764595	Female	77	Better	8		8	8286.79
287307	Male	82	Better	24		24	38490.5
757389	Male	65	Better	8	4	12	22845.9
765625	Female	80	Better	35		35	45664.2
765187	Male	58	Better	8		8	8933.97
765055	Male	87	Better	6	3	9	29801.4
764915	Male	63	Better	6	1	7	9968.03
763647	Male	80	Better	14		14	20900.9
500363	Male	76	Better	8		8	6544.8
635023	Male	57	Better	13		13	11923.9
765645	Female	58	Better	7		7	19358.4
765606	Male	78	Better	10	3	13	30241.1
765556	Male	66	Better		4	4	34592.2
765418	Female	85	Better	14		14	15382.1
764986	Male	49	Others	7		7	13781
764906	Male	62	Better	7		7	14674.5
764966	Male	56	Better	5		5	17723.4
764896	Female	37	Better	5		5	6681.12
764546	Male	44	Better	4		4	6238.89
716995	Male	75	Better	23		23	42917.4
765868	Male	29	Others		7	7	69859.8
763699	Female	66	Better		6	6	39437.8
756287	Male	67	Better	17		17	34704.8
637537	Female	67	Better	11		11	18718.7
476119	Female	78	Better	19		19	18535.3
765706	Male	33	Better	3	2	5	33001.6
765310	Female	39	Better	11		11	12564.7
756959	Male	50	Better	4		4	18354.5
241213	Female	91	Better	2		2	5107.46
730038	Male	51	Better	7		7	18921.1
765088	Female	62	Others	9		9	13371.3
661947	Female	73	Better	7		7	9965.16
734497	Male	51	Better	14	4	18	49845.9
766372	Male	77	Better	18		18	21158.6
765588	Female	72	Better	18		18	39770.2
764768	Female	77	Better	11		11	16287.7
517567	Female	48	Better	7		7	12048
757330	Female	64	Better	9	2	11	18971.3
757260	Male	18	Better	13		13	14564.3
757220	Male	49	Better	44		44	88866.4
757210	Female	35	Better	8	1	9	16404.7
645047	Male	90	Better	17		17	16665.5
386216	Male	80	Better	27		27	21298.6
606533	Male	84	Better	24		24	51334.2
712607	Male	59	Better	7		7	8381.4
733202	Female	60	Better	7		7	1410.66
767282	Male	56	Better	4		4	13869.9
765839	Male	77	Better	13	1	14	33404.9
764939	Male	58	Better	7		7	7906.92
764779	Female	79	Untreated	15		15	17248.5
767042	Male	53	Better	14		14	10782.4
764669	Female	60	Better	7		7	11956.1
596893	Male	79	Better	17	5	22	46210.3
710673	Male	81	Better	15		15	14983.7
767153	Male	75	Better	19		19	38939.2
767123	Female	72	Better	5		5	4619.64
766473	Male	65	Untreated	19		19	26892.4
765743	Male	70	Untreated	3		3	10655.1
765030	Male	27	Better	2		2	8926.54
764810	Female	63	Better	16		16	14458.6
764420	Female	55	Better	14		14	14719
753404	Male	84	Better	1		1	6293.01
481279	Male	75	Better	15		15	26390.6
435473	Female	80	Better	11	3	14	28623.5
[truncated: 10,380 more rows]
